# Supplementary material for: Paternal hypercholesterolemia elicits sex-specific exacerbation of atherosclerosis in offspring
Source: PubMed Central journal article supplement (PMC11385100; doi:10.1172/jci.insight.179291), 2024-09-10
Supplement: jciinsight-9-179291-s012.pdf [file jciinsight-9-179291-s012.pdf]

Supplemental Material for

**Paternal hypercholesterolemia elicits sex-specific exacerbation of atherosclerosis in offspring**

Rebecca Hernandez,<sup>1</sup> Xiuchun Li,<sup>1</sup> Junchao Shi,<sup>1,2</sup> Tejasvi Dave<sup>1</sup>, Tong Zhou,<sup>3</sup> Qi Chen,<sup>2</sup> and Changcheng Zhou<sup>1</sup>

<sup>1</sup>Division of Biomedical Sciences, School of Medicine, University of California, Riverside, California, USA

<sup>2</sup> Molecular Medicine Program, Department of Human Genetics, and Division of Urology, Department of Surgery, University of Utah School of Medicine, Salt Lake City, Utah, USA

<sup>3</sup>Department of Physiology and Cell Biology, University of Nevada, Reno School of Medicine, Reno, Nevada, USA

**This PDF file includes:**

**Supplemental Figure 1-7**  
**Supplemental Table 1-3**

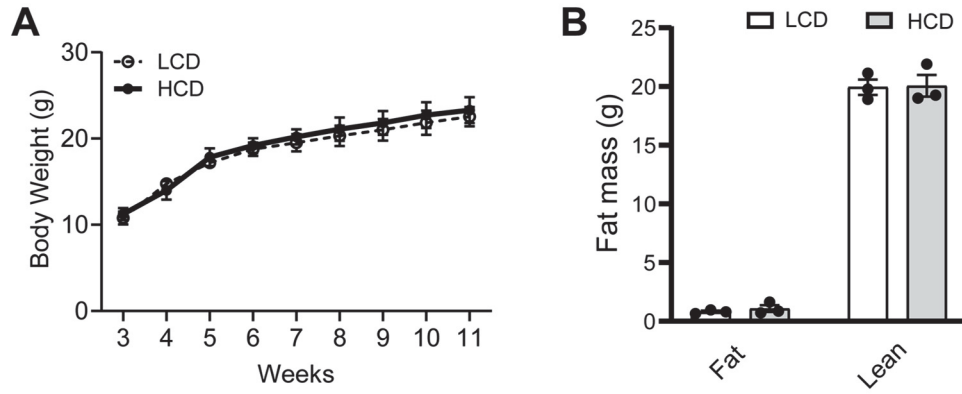

**Supplemental Figure 1. High-cholesterol diet feeding does not affect body weight and adiposity in LDLR<sup>-/-</sup> mice.**

Three-week-old male LDLR<sup>-/-</sup> mice were fed an LCD or HCD for 9 weeks. (A) Growth curves were measured (n=5-6, two-way ANOVA followed by Bonferroni's multiple comparison test). (B) Body composition of LDLR<sup>-/-</sup> mice fed an LCD or HCD were measured (n=3, two-sample, two tailed Student's t-test). All data are plotted as means ± S.E.M.

F1 Males

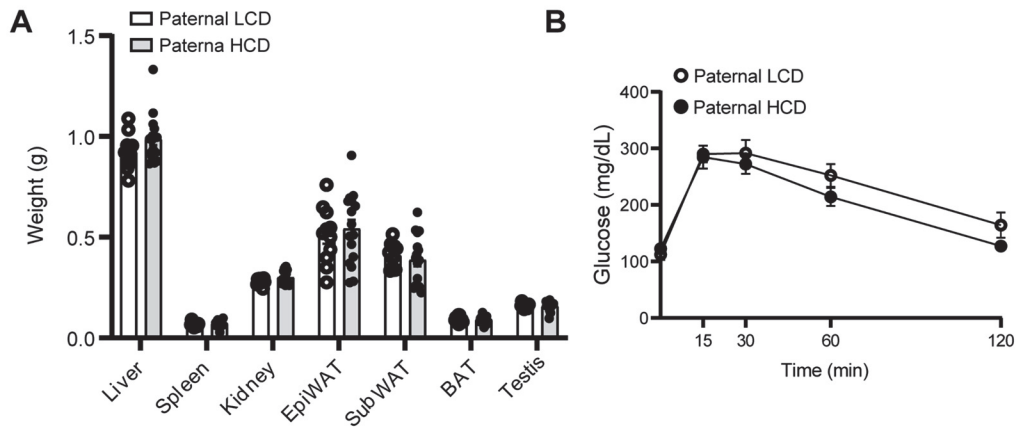

F1 Females

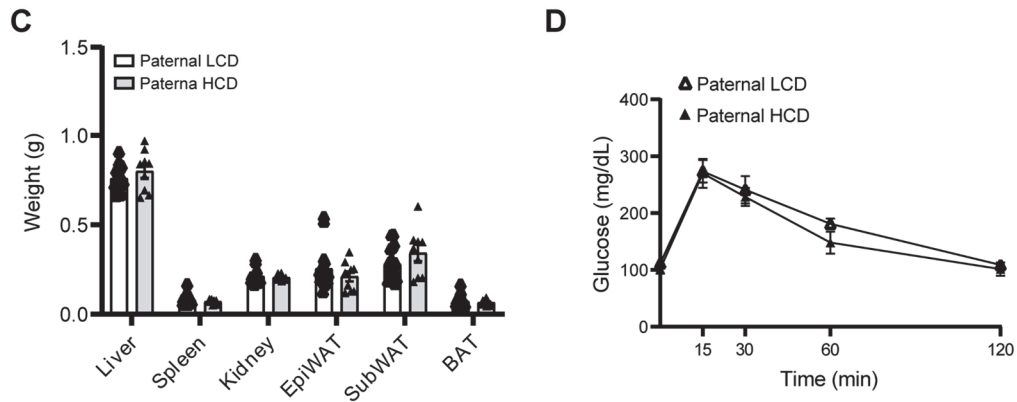

**Supplemental Figure 2. Paternal hypercholesterolemia does not affect organ weight or glucose tolerance tests in F1 LDLR<sup>-/-</sup> offspring.**

Three-week-old male LDLR<sup>-/-</sup> mice were fed an LCD or HCD diet for 8 weeks before mating with female LDLR<sup>-/-</sup> mice. Three-week-old F1 offspring were fed an LCD for 16 weeks and euthanized at 19 weeks of age. Major organ weights (A and C) of male and female offspring were measured (n=9-18, \*P<0.05, two-sample, two tailed Student's t-test). (B and D) Intraperitoneal glucose tolerance test (IPGTT) of male and female offspring was performed (n=8-10, two-way ANOVA followed by Bonferroni's multiple comparison test). All data are plotted as means ± S.E.M.

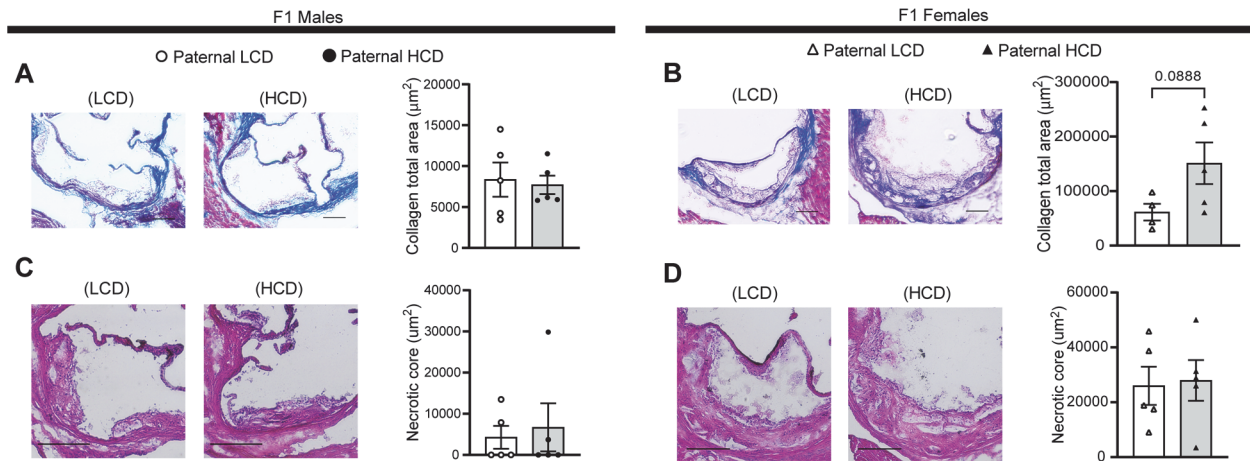

**Supplemental Figure 3. Paternal high cholesterol diet does not affect collagen production or necrotic core formation in the aortic root of F1 offspring.**

Three-week-old male C57BL/6 LDLR<sup>-/-</sup> littermates were fed an LCD or HCD diet for 8 weeks before mating with female LDLR<sup>-/-</sup> mice. Three-week-old F1 offspring were fed a LCD for 16 weeks and euthanized at 19-weeks of age. (A and B) Masson's Trichrome stain was used to measure the collagen content at the aortic root of male (A) and female (B) offspring. Representative images are shown to the left of each data set (scale bar=100 $\mu\text{m}$ ). (C and D) Hematoxylin and eosin staining was used for analyzing the necrotic core at the aortic root of male (C) and female (D) offspring. Representative images are shown to the left of each data set (scale bar=200 $\mu\text{m}$ ). Statistical significance was determined by independent t-test. All data are plotted as means  $\pm$  S.E.M. (n=4-5).

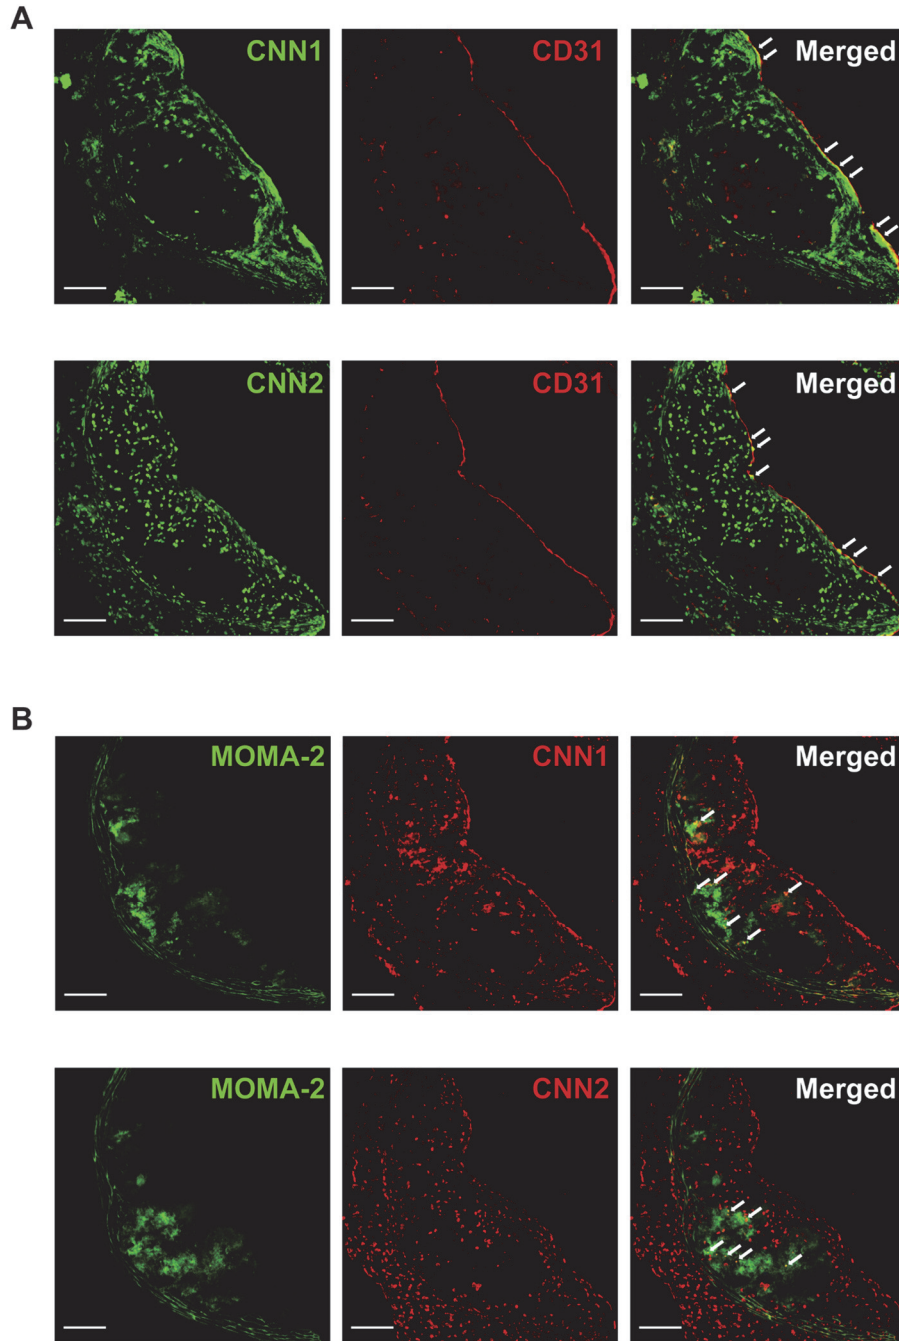

**Supplemental Figure 4. CCN proteins are co-localized with macrophage and endothelial cells in atherosclerotic lesions.**

(A) Representative images of CD31 and CCN1 or CCN2 immunofluorescent staining in the aortic root of LDLR<sup>-/-</sup> mice (scale bar=100μm). (B) Representative images of 3 experimental replicates for MOMA-2 and CCN1 or CCN2 immunofluorescent staining in the aortic root of LDLR<sup>-/-</sup> mice (scale bar=100μm).

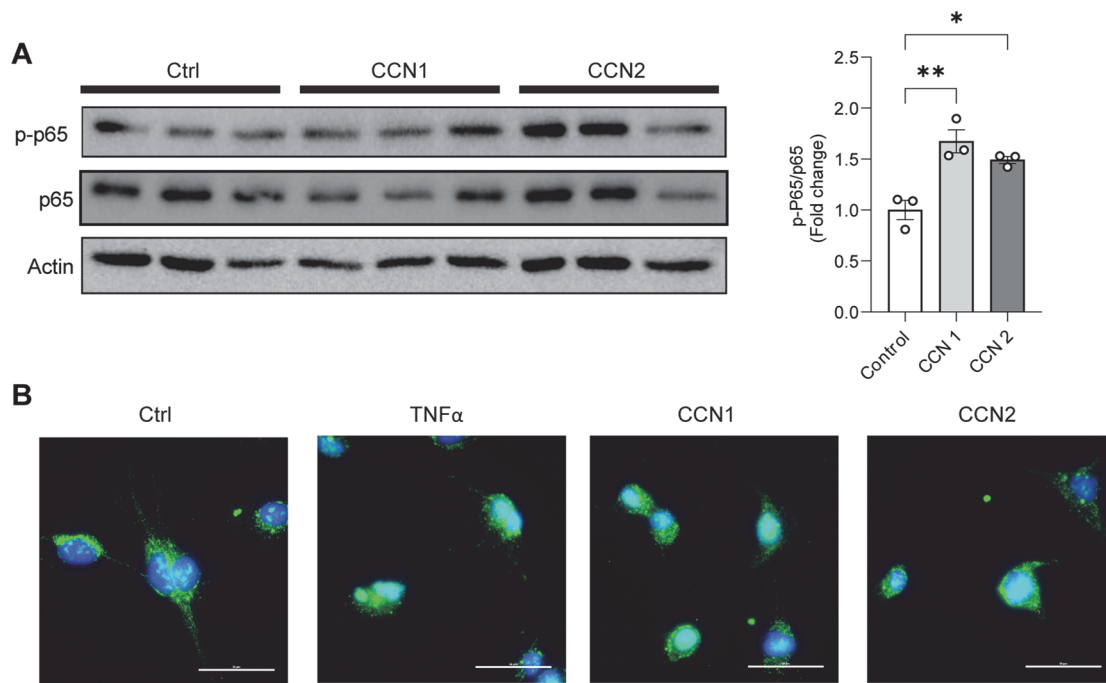

**Supplemental Figure 5. CCN proteins stimulate NF- $\kappa$ B activation in human endothelial cells.** (A) Human endothelial cells, HMEC-1 cells, were treated with 1  $\mu$ g/ml CCN1 or CCN2 for 1 hour followed by protein extraction. Immunoblotting of phosphorylated NF- $\kappa$ B subunit p65, total 65, and Actin (left) and quantification data (right) (n=3, \*P<0.05, \*\*P<0.05, one-way ANOVA followed by Bonferroni's multiple comparison test). (B) Representative immunofluorescence staining images of 3 experimental replicates for NF- $\kappa$ B p65 (green) in HMEC-1 cells treated with vehicle control or 1  $\mu$ g/ml CCN1 or CCN2 for 3 hours. The nuclei were stained with DAPI (blue). (scale bar= 50 $\mu$ m). All data are plotted as means  $\pm$  S.E.M.

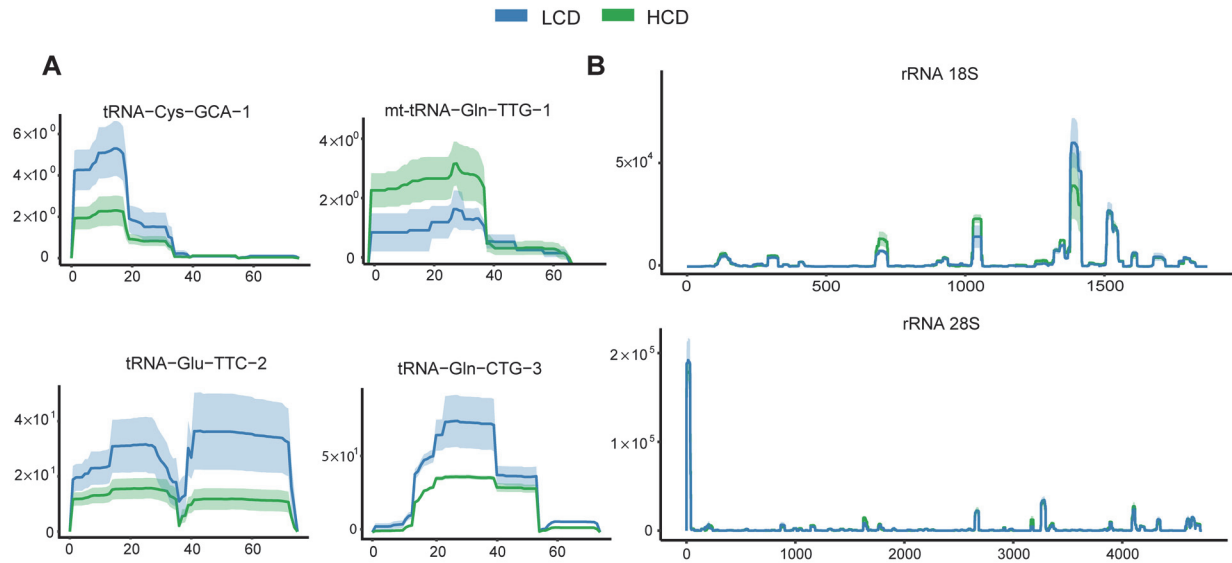

**Supplemental Figure 6. PADNORA-seq reveals dynamic changes to high-cholesterol diet feeding of representative sperm tsRNAs and rRNAs.**

Three-week-old male *LDLR<sup>-/-</sup>* mice were fed an LCD or HCD for 9 weeks. Total RNAs were isolated from the sperm and used for PANDORA-seq. (A-B) Dynamic responses to the LCD or HCD of representative individual sperm tsRNAs (A) and sperm rRNAs (B) detected by PADNORA-seq. Mapping plots are presented as mean  $\pm$  SEM ( $n = 3$  in each group).

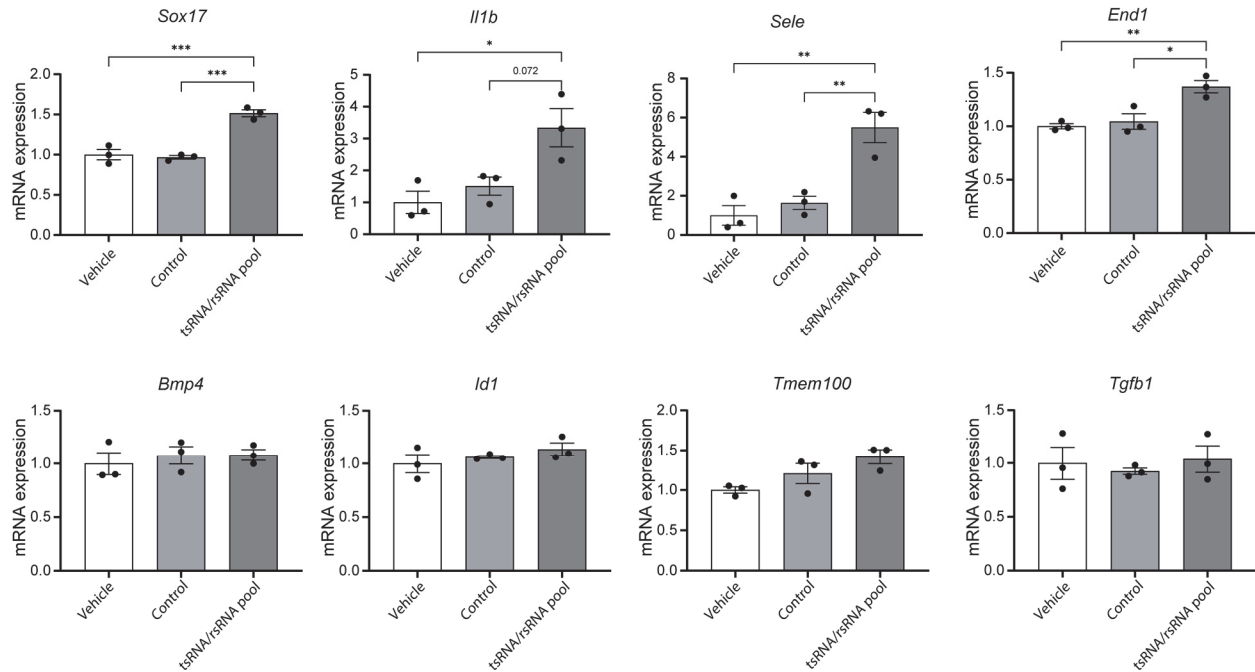

**Supplemental Figure 7. Hypercholesterolemia-stimulated sperm tsRNAs/rsRNAs induce early transcription changes in murine embryoid bodies.**

Murine embryonic stem cells were transfected with a pool of tsRNA/rsRNAs, control oligo or vehicle followed by 24 hours of embryoid body (EB) formation assay. Total RNA was isolated from EBs for gene expression analysis. The expression levels of indicated genes were analyzed by quantitative real-time PCR (n=3, \*P<0.05, \*\*P<0.01). Statistical significance was determined by one-way ANOVA followed by Bonferroni's multiple comparison test. All data are plotted as means  $\pm$  S.E.M.



**Supplemental Table 1. Detailed RNA-seq data of intimal DEGs induced by paternal HCD feeding in F1 male LDLR<sup>-/-</sup> mice**

| Gene     | log2 (FC)    | P-value     | FDR         | FC       | Gene     | log2 (FC)    | P-value     | FDR          | FC       |
|----------|--------------|-------------|-------------|----------|----------|--------------|-------------|--------------|----------|
| Ppm1n    | 8.031722239  | 0.000437032 | 0.069087641 | 261.6913 | Islr     | -1.183308958 | 0.000305797 | 0.057657344  | 0.431904 |
| Mup7     | 6.93620077   | 0.000518341 | 0.075430815 | 122.4629 | Nexn     | -1.211218886 | 0.000845023 | 0.095430365  | 0.429626 |
| Olfir731 | 6.497106881  | 2.89304E-05 | 0.017424912 | 90.32835 | Col6a2   | -1.21884639  | 0.000121527 | 0.03981086   | 0.428694 |
| Myh1     | 5.559119457  | 0.000199743 | 0.050376497 | 47.14783 | Fzd2     | -1.221980808 | 0.000279886 | 0.055152134  | 0.423375 |
| Dusp13   | 5.447649862  | 0.000280667 | 0.055152134 | 43.64214 | Ms4a4d   | -1.239991122 | 0.000661709 | 0.083512139  | 0.421398 |
| Il6      | 5.254781324  | 3.97313E-05 | 0.019895097 | 38.18096 | Ano1     | -1.246745267 | 0.000403924 | 0.067183507  | 0.419896 |
| Bcan     | 5.215276802  | 0.000661513 | 0.083512139 | 37.14965 | Serpine2 | -1.251896623 | 0.000123015 | 0.03981086   | 0.418756 |
| Mab21l3  | 5.04002662   | 0.000666233 | 0.083512139 | 32.90025 | Rcan2    | -1.255819099 | 1.59568E-05 | 0.015364023  | 0.413882 |
| Ldlrad1  | 4.940193852  | 0.000872211 | 0.097485278 | 30.70058 | Akap12   | -1.272707128 | 0.000282336 | 0.055152134  | 0.412841 |
| Tpm3-rs7 | 4.636642279  | 0.000502501 | 0.073619722 | 24.8753  | Gria4    | -1.276340421 | 0.000294793 | 0.056070081  | 0.408718 |
| Vmn1r73  | 4.475230886  | 0.000753086 | 0.088745451 | 22.24225 | Mark1    | -1.290821309 | 0.000258757 | 0.054472117  | 0.407925 |
| Fosb     | 4.164003971  | 2.39326E-05 | 0.016771729 | 17.92628 | Hmgcs2   | -1.293624662 | 0.000281839 | 0.055152134  | 0.406516 |
| Rspo2    | 3.627875217  | 0.00063485  | 0.083426988 | 12.3623  | Mrv1     | -1.298614378 | 0.000246243 | 0.056070081  | 0.402605 |
| Egr1     | 2.583294077  | 0.000349608 | 0.061133504 | 5.993065 | F13a1    | -1.312563207 | 0.000119326 | 0.03981086   | 0.402533 |
| Fos      | 2.541358626  | 0.000143499 | 0.043380327 | 5.82137  | Tent5b   | -1.312820949 | 0.000149805 | 0.043894986  | 0.402099 |
| Socs3    | 2.536426146  | 3.39487E-05 | 0.018874634 | 5.801501 | Fmo3     | -1.314377057 | 6.44109E-06 | 0.008215418  | 0.40114  |
| Cxcl1    | 2.016171098  | 0.000599181 | 0.081750448 | 4.045088 | Thsd4    | -1.317822738 | 0.000338096 | 0.060089694  | 0.400061 |
| H2ac6    | 1.826818135  | 0.000271592 | 0.055036622 | 3.547538 | Lgr6     | -1.321708375 | 6.92187E-06 | 0.008227875  | 0.399927 |
| Eps8l1   | 1.575066609  | 0.000896725 | 0.098698943 | 2.979492 | Brd3os   | -1.323098003 | 0.000568185 | 0.079483634  | 0.399676 |
| Gadd45b  | 1.190810079  | 0.000154217 | 0.044585195 | 2.282809 | Slc24a3  | -1.328412167 | 6.36869E-05 | 0.02761846   | 0.398206 |
| Plk3     | 1.138785961  | 0.000702001 | 0.085513973 | 2.201956 | Sec16b   | -1.33423745  | 0.000792813 | 0.092832959  | 0.396602 |
| Sox7     | 1.126276399  | 0.000896665 | 0.098421442 | 2.182946 | Gucy1b1  | -1.33614819  | 0.000374694 | 0.0563972363 | 0.396077 |
| Micall2  | 0.956059065  | 2.70765E-05 | 0.017424912 | 1.940003 | Cd163    | -1.342369462 | 0.000796335 | 0.092832959  | 0.394372 |
| Smad6    | 0.90873493   | 0.000911852 | 0.098918842 | 1.877399 | Fbln1    | -1.342675179 | 0.000716601 | 0.086322564  | 0.394289 |
| Pim1     | 0.885693755  | 0.000742437 | 0.088451927 | 1.847653 | Plekhh2  | -1.351740403 | 0.000693874 | 0.085335567  | 0.391819 |
| Nt5e     | 0.778248835  | 0.000549323 | 0.077849498 | 1.715048 | Gabra3   | -1.355973843 | 3.60956E-05 | 0.019566527  | 0.390671 |
| Cadm1    | 0.745583817  | 0.000136698 | 0.042576856 | 1.676653 | Dnra     | -1.361343626 | 6.13684E-05 | 0.02761846   | 0.38922  |
| Arl4c    | 0.69423731   | 0.000174582 | 0.047624487 | 1.618029 | Rbm24    | -1.365103912 | 0.000842291 | 0.095430365  | 0.388206 |
| Nova1    | 0.686111871  | 0.000649243 | 0.083512139 | 1.608941 | Gli1     | -1.371134371 | 0.000149179 | 0.043894986  | 0.386587 |
| Exoc6    | 0.654272716  | 0.000723408 | 0.08666108  | 1.573822 | Ldb3     | -1.37744501  | 0.000537726 | 0.076707366  | 0.3849   |
| Prkce    | 0.632445805  | 0.000399016 | 0.067068721 | 1.550191 | Abcc9    | -1.382811676 | 0.000332723 | 0.059623346  | 0.383471 |
| Slc46a3  | 0.625453293  | 0.000168443 | 0.047291574 | 1.542695 | Sh3bgr   | -1.385991247 | 6.61058E-07 | 0.002047675  | 0.382627 |
| Adgre5   | 0.620944872  | 0.000271484 | 0.055036622 | 1.537882 | Susd5    | -1.386696526 | 0.000535237 | 0.076707366  | 0.38244  |
| Lgalsl   | -0.595786994 | 0.000630641 | 0.083379179 | 0.661683 | Epha3    | -1.386935351 | 0.00062363  | 0.083186515  | 0.382376 |
| Smardc3  | -0.596622964 | 0.000362473 | 0.062876043 | 0.6613   | Dmpk     | -1.390703226 | 4.43361E-06 | 0.006408929  | 0.381379 |
| Itgb1    | -0.621599556 | 0.00059526  | 0.081750448 | 0.649955 | Scube3   | -1.403914798 | 0.000692737 | 0.085335567  | 0.377902 |
| Col4a5   | -0.631624619 | 0.000115263 | 0.03981086  | 0.645449 | Dsp      | -1.404824307 | 5.39495E-07 | 0.002047675  | 0.377664 |
| Cercam   | -0.642652306 | 0.000164239 | 0.04685788  | 0.640534 | Ncald    | -1.413533838 | 0.000817014 | 0.0944789    | 0.375391 |
| Serpinh1 | -0.646872065 | 0.000819169 | 0.0944789   | 0.638664 | Stum     | -1.437786654 | 4.03719E-05 | 0.019895097  | 0.369133 |
| Twsg1    | -0.668798654 | 0.000594238 | 0.081750448 | 0.62903  | Postn    | -1.438783302 | 0.000426565 | 0.069023926  | 0.368878 |
| Tspan11  | -0.728331586 | 0.000603096 | 0.081750448 | 0.603602 | Col16a1  | -1.469359186 | 0.000692026 | 0.085335567  | 0.361143 |
| Ift43    | -0.730888683 | 4.38286E-05 | 0.021118556 | 0.602533 | Jph2     | -1.485687798 | 0.000241563 | 0.053998044  | 0.357078 |
| Ndrg2    | -0.731063746 | 0.000437502 | 0.069087641 | 0.60246  | Kcnmb1   | -1.493455181 | 7.40734E-05 | 0.030304404  | 0.355161 |
| Nkd1     | -0.736711068 | 0.000290196 | 0.055684196 | 0.600106 | Myh11    | -1.494171034 | 2.07406E-05 | 0.016061401  | 0.354985 |
| Synpo2   | -0.750401469 | 0.00066631  | 0.083512139 | 0.594438 | Adamtsl2 | -1.50718569  | 0.000247767 | 0.054265918  | 0.351797 |
| Cbr2     | -0.772823822 | 2.23838E-06 | 0.004412249 | 0.585271 | Nox4     | -1.509113938 | 1.50928E-05 | 0.015364023  | 0.351327 |
| Jam3     | -0.774276521 | 7.00905E-05 | 0.029799438 | 0.584682 | Cap2     | -1.526800546 | 0.000527529 | 0.076256117  | 0.347046 |
| Arhgef17 | -0.782973123 | 0.000194041 | 0.050376497 | 0.581168 | Fstl3    | -1.550734754 | 2.35737E-05 | 0.016771729  | 0.341336 |
| Col4a6   | -0.795788843 | 3.95047E-05 | 0.019895097 | 0.576028 | Cldn10   | -1.553025711 | 0.000928491 | 0.099665662  | 0.340795 |
| Paps2    | -0.803700073 | 1.89657E-06 | 0.004112342 | 0.572878 | Ntf3     | -1.553242331 | 8.96962E-06 | 0.00972419   | 0.340743 |
| Il33     | -0.813819868 | 5.55007E-06 | 0.007521389 | 0.568874 | Itga8    | -1.57375689  | 0.000220567 | 0.052405482  | 0.335932 |
| Tead3    | -0.818153815 | 0.000425299 | 0.069023926 | 0.567167 | Prss12   | -1.598586    | 0.00056493  | 0.079483634  | 0.3302   |
| Sema5a   | -0.824626071 | 0.000825541 | 0.094710139 | 0.564629 | Clmp     | -1.601280721 | 0.000105333 | 0.037441518  | 0.329584 |
| Mylk     | -0.851025007 | 3.57384E-06 | 0.006007331 | 0.554391 | Filip1   | -1.611073001 | 0.000250508 | 0.054317667  | 0.327355 |
| Vasn     | -0.852856604 | 1.57288E-07 | 0.002047675 | 0.553687 | Sgcg     | -1.679981444 | 1.82682E-05 | 0.015364023  | 0.312087 |
| Wfdc1    | -0.887510008 | 7.20978E-06 | 0.008227875 | 0.540546 | Fbxo40   | -1.687762406 | 0.000221862 | 0.052405482  | 0.310408 |
| Bcl6     | -0.891017556 | 1.20311E-06 | 0.002898561 | 0.539234 | Mst1r    | -1.689093439 | 0.000224769 | 0.052405482  | 0.310122 |
| Osr1     | -0.897578733 | 2.59437E-05 | 0.017424912 | 0.536787 | Sync     | -1.693337888 | 7.29241E-05 | 0.030304404  | 0.309211 |
| Nbl1     | -0.898290413 | 0.000189774 | 0.050181368 | 0.536522 | Fibin    | -1.699699709 | 4.35089E-07 | 0.002047675  | 0.30785  |
| St5      | -0.90493589  | 1.70653E-05 | 0.015364023 | 0.534056 | Ngef     | -1.750458197 | 0.000396503 | 0.067068721  | 0.297207 |
| Sema3d   | -0.915736279 | 9.75752E-07 | 0.002644654 | 0.530073 | Bmpr1b   | -1.754105576 | 7.68223E-05 | 0.030846998  | 0.296457 |
| Enah     | -0.915873599 | 0.000642699 | 0.083512139 | 0.530023 | Col15a1  | -1.757757099 | 2.03611E-07 | 0.002047675  | 0.295708 |
| Cfb      | -0.922848931 | 5.7393E-05  | 0.026611807 | 0.527466 | Tub      | -1.761767169 | 0.000471684 | 0.070769966  | 0.294887 |
| Aldh1a1  | -0.934698547 | 0.000332522 | 0.059623346 | 0.523152 | Mylk4    | -1.800942192 | 3.59771E-07 | 0.002047675  | 0.286987 |
| Tes      | -0.943020942 | 1.84229E-05 | 0.015364023 | 0.520143 | Cacnb2   | -1.804141053 | 0.000262143 | 0.054654351  | 0.286351 |
| Igfbp7   | -0.964216138 | 0.000663064 | 0.083512139 | 0.512557 | Matn2    | -1.804615149 | 0.000177908 | 0.047624487  | 0.286257 |
| Sparcl1  | -0.964877087 | 6.18076E-07 | 0.002047675 | 0.512322 | Sh3rf2   | -1.808183221 | 0.000175938 | 0.047624487  | 0.28555  |
| Tgfb3    | -0.977256496 | 0.000446008 | 0.069574032 | 0.507945 | Kcnab1   | -1.827919106 | 0.000321748 | 0.059122523  | 0.281671 |
| Efh1d1   | -0.982461908 | 0.000170121 | 0.047291574 | 0.506115 | Kcnma1   | -1.842176544 | 0.000125273 | 0.039945545  | 0.278901 |
| Rarres2  | -0.986598723 | 0.000371969 | 0.063972363 | 0.504666 | Gipc2    | -1.879541166 | 0.000208817 | 0.050873859  | 0.271777 |
| Ramp1    | -0.994161306 | 0.000606304 | 0.081750448 | 0.502028 | Fbxo2    | -1.931527294 | 2.8081E-05  | 0.017424912  | 0.262152 |
| Arhgef25 | -1.003005891 | 6.26483E-05 | 0.02761846  | 0.498959 | Sv2a     | -2.066383715 | 0.000103675 | 0.037441518  | 0.238757 |
| Atf5     | -1.015353033 | 0.000466278 | 0.070769966 | 0.494707 | Angptl7  | -2.107137375 | 0.000325444 | 0.059299203  | 0.232107 |
| Cacna2d1 | -1.024826784 | 0.000607011 | 0.081750448 | 0.491469 | Casq1    | -2.124445129 | 3.35621E-05 | 0.018874634  | 0.229339 |
| Srpx     | -1.028597883 | 0.000119568 | 0.03981086  | 0.490186 | Tceal6   | -2.140516477 | 3.60168E-06 | 0.006007331  | 0.226799 |
| Sept5    | -1.028788479 | 2.39784E-05 | 0.016771729 | 0.490122 | Msc      | -2.794469316 | 0.000137452 | 0.042576856  | 0.144139 |
| Ppp1r12b | -1.029258105 | 3.70149E-05 | 0.019575486 | 0.489962 | Lrrc75b  | -2.797037752 | 0.000436485 | 0.069087641  | 0.143882 |

|         |              |             |             |          |         |              |             |             |          |
|---------|--------------|-------------|-------------|----------|---------|--------------|-------------|-------------|----------|
| Sost    | -1.039567918 | 7.83283E-05 | 0.030879882 | 0.486473 | Cdh18   | -3.021646843 | 0.000696601 | 0.085335567 | 0.123138 |
| Npnt    | -1.048669793 | 9.40843E-05 | 0.034576782 | 0.483414 | Cyp4f14 | -3.298312419 | 0.000439704 | 0.069087641 | 0.10165  |
| Csrp2   | -1.050509557 | 2.06113E-05 | 0.016061401 | 0.482798 | Gm11541 | -3.70752512  | 0.00022991  | 0.05303341  | 0.076546 |
| Galnt16 | -1.051229782 | 0.000204389 | 0.050873859 | 0.482557 | Gm11639 | -3.810824907 | 0.000348391 | 0.061133504 | 0.071257 |
| Abca9   | -1.064130002 | 0.000457994 | 0.070430363 | 0.478261 | Krt14   | -4.159706848 | 0.000317666 | 0.058871376 | 0.05595  |
| Gpsm2   | -1.065436833 | 0.000712776 | 0.086322564 | 0.477828 | Pklr    | -4.803371594 | 0.000199805 | 0.050376497 | 0.035813 |
| Npy1r   | -1.082881735 | 5.76837E-05 | 0.026611807 | 0.472085 | Epcam   | -4.851266639 | 0.000405896 | 0.067183507 | 0.034644 |
| Pde5a   | -1.085785602 | 9.04028E-05 | 0.033796628 | 0.471136 | Scn10a  | -4.88921117  | 0.000285148 | 0.055204239 | 0.033744 |
| Medag   | -1.088141954 | 0.000491782 | 0.072539467 | 0.470367 | Onecut2 | -5.505000307 | 8.70236E-05 | 0.033104073 | 0.022021 |
| Dact3   | -1.088811299 | 0.000199447 | 0.050376497 | 0.470149 | Pkp3    | -5.538616874 | 8.20688E-05 | 0.031776763 | 0.021513 |
| Sema3c  | -1.104926563 | 0.000625347 | 0.083186515 | 0.464926 | Ly6g2   | -5.584506795 | 0.000473258 | 0.070769966 | 0.02084  |
| Heyl    | -1.119539421 | 1.70411E-05 | 0.015364023 | 0.460241 | Pcdha9  | -5.660012976 | 0.000652057 | 0.083512139 | 0.019777 |
| C2      | -1.12131389  | 0.000455317 | 0.070430363 | 0.459675 | Ttr     | -5.743751963 | 0.000144048 | 0.043380327 | 0.018662 |
| Olfml2b | -1.13569966  | 0.000469157 | 0.070769966 | 0.455114 | Cabp4   | -6.131594306 | 0.000313219 | 0.058547714 | 0.014263 |
| Dkk3    | -1.137513427 | 4.17854E-06 | 0.006408929 | 0.454542 | Cblc    | -6.302650195 | 0.000268668 | 0.055036622 | 0.012668 |
| Prep1   | -1.145158156 | 0.000916971 | 0.098918842 | 0.45214  | Cpn1    | -6.394426027 | 0.000485001 | 0.072029363 | 0.011887 |
| Fgf1    | -1.158406746 | 3.05647E-05 | 0.017911711 | 0.448007 | Gdf1    | -7.189480262 | 2.86689E-05 | 0.017424912 | 0.006851 |
| Olfml1  | -1.165365387 | 0.00091082  | 0.098918842 | 0.445851 | Akr1b7  | -7.795129597 | 0.000120996 | 0.03981086  | 0.004502 |
| Rgs7bp  | -1.166154371 | 0.000257483 | 0.054472117 | 0.445608 | Aoc1    | -8.025595618 | 0.000750326 | 0.088745451 | 0.003838 |
| Igfbp6  | -1.168456479 | 0.000417127 | 0.068519483 | 0.444897 | Mgat4c  | -8.442351457 | 0.000838721 | 0.095430365 | 0.002875 |
| Aspn    | -1.322192342 | 0.000254462 | 0.054472117 | 0.441381 | Crisp1  | -9.069918908 | 0.000224771 | 0.052405482 | 0.001861 |
| Htra3   | -1.179904463 | 0.000853378 | 0.095874608 | 0.44034  |         |              |             |             |          |

**Supplemental Table 2. Detailed RNA-seq data of intimal DEGs induced by paternal HCD feeding in F1 female LDLR<sup>-/-</sup> mice**

| Gene      | log2 (FC)   | P-value     | FDR         | FC          | Gene     | log2 (FC)    | P-value     | FDR         | FC          |
|-----------|-------------|-------------|-------------|-------------|----------|--------------|-------------|-------------|-------------|
| Otop1     | 8.814022723 | 0.00016446  | 0.045782214 | 450.0753441 | Fcer1g   | 0.941486608  | 1.53919E-05 | 0.018073585 | 1.920506182 |
| Hist1h2ap | 5.932732553 | 0.000364659 | 0.066444582 | 61.08442003 | Lrrc25   | 0.938580645  | 0.000140936 | 0.041861881 | 1.916641677 |
| Gm7233    | 5.408642117 | 6.75498E-05 | 0.034873408 | 42.47794644 | Evi2b    | 0.933430588  | 3.15694E-05 | 0.028521597 | 1.909811947 |
| Tmprss3   | 5.171289901 | 0.000279492 | 0.059413936 | 36.03407487 | Coro1a   | 0.929436253  | 5.26138E-05 | 0.031448092 | 1.904531636 |
| Axdnd1    | 4.790355893 | 1.92153E-05 | 0.02083224  | 27.67201687 | Sp1      | 0.928419726  | 0.000112114 | 0.037983976 | 1.903190171 |
| D7Ert443e | 4.69969579  | 0.000476106 | 0.07544744  | 25.98659651 | Cxcl16   | 0.925479659  | 0.000138853 | 0.041861881 | 1.899315611 |
| Nps       | 4.476442521 | 0.000501548 | 0.076049463 | 22.26093865 | Rnf149   | 0.923996186  | 0.000438393 | 0.074565456 | 1.897363615 |
| Sleo4c1   | 3.891207736 | 0.000617368 | 0.086373158 | 14.83782511 | Bin2     | 0.920916851  | 0.000559181 | 0.081734682 | 1.893318139 |
| Erich6    | 3.727604239 | 0.000181859 | 0.048088332 | 13.24709613 | Evi2a    | 0.920464249  | 0.00017175  | 0.04655064  | 1.89272426  |
| Spaca9    | 3.499097137 | 4.64935E-05 | 0.031448092 | 11.3066304  | Gatm     | 0.915902505  | 0.000308673 | 0.061403285 | 1.886748994 |
| Lrr1      | 3.385946612 | 0.000707963 | 0.091373544 | 10.45373517 | Cd53     | 0.9147479    | 0.000166151 | 0.045782214 | 1.885239612 |
| Ccn1      | 2.413898377 | 0.000240566 | 0.056932649 | 5.329123906 | Apoe     | 0.909719617  | 0.000774821 | 0.098632164 | 1.878680348 |
| Syt3      | 2.40457603  | 0.000497054 | 0.075898797 | 5.29479941  | Ncf4     | 0.908214424  | 0.000155325 | 0.044314757 | 1.876721304 |
| Igfbp2    | 2.200582039 | 4.07062E-12 | 8.82633E-08 | 4.596647511 | Ly86     | 0.90280727   | 0.000114411 | 0.038075161 | 1.869700605 |
| Thbs1     | 2.001286144 | 4.95477E-05 | 0.031448092 | 4.003567539 | Ccr5     | 0.900905018  | 7.86533E-05 | 0.035529994 | 1.867236954 |
| Npy       | 1.888606974 | 0.000117456 | 0.038075161 | 3.702775225 | Milr1    | 0.893617731  | 0.000424139 | 0.072989005 | 1.857829017 |
| Rgs1      | 1.843967418 | 6.31906E-07 | 0.001957374 | 3.589959124 | Lpxn     | 0.889798363  | 9.94457E-05 | 0.037812439 | 1.852917134 |
| Edn1      | 1.819222498 | 0.00025637  | 0.056932649 | 3.52890966  | Fyb      | 0.887962033  | 0.000545004 | 0.081498755 | 1.850560155 |
| Col6a4    | 1.801391876 | 0.00070097  | 0.091012742 | 3.485563416 | C1qb     | 0.883649534  | 0.000486507 | 0.075474474 | 1.845036726 |
| Arl5c     | 1.726177667 | 2.39837E-05 | 0.023099773 | 3.30850089  | Ptpn6    | 0.880146215  | 0.000382501 | 0.067981695 | 1.840561831 |
| Hs6st2    | 1.650970311 | 2.80748E-07 | 0.001217492 | 3.140447848 | Acta2    | 0.873815783  | 5.56424E-05 | 0.031448092 | 1.832503283 |
| Spp1      | 1.635567432 | 2.49707E-07 | 0.001217492 | 3.107097325 | Vav1     | 0.868863225  | 0.000640755 | 0.086373158 | 1.826223357 |
| Trim7     | 1.60423652  | 0.000655995 | 0.08673138  | 3.040348116 | Selplg   | 0.867304285  | 0.0004702   | 0.075474474 | 1.824251051 |
| Tmem171   | 1.564816949 | 0.000345597 | 0.064713179 | 2.95839963  | Cyba     | 0.863918602  | 0.000109374 | 0.037812439 | 1.819974961 |
| F7        | 1.564298468 | 2.01265E-07 | 0.001217492 | 2.957336619 | Ctla2a   | 0.861228411  | 7.33399E-05 | 0.034969723 | 1.816584418 |
| Stap1     | 1.542367008 | 4.88393E-05 | 0.031448092 | 2.912719972 | Cytip    | 0.856972995  | 0.000557988 | 0.081734682 | 1.811234062 |
| Apoc2     | 1.525318985 | 5.12782E-06 | 0.01110782  | 2.878503536 | Hcls1    | 0.851590361  | 2.45028E-05 | 0.023099773 | 1.804489016 |
| Cla3a2    | 1.474242485 | 0.000340821 | 0.064713179 | 2.778377215 | Map3k7cl | 0.851255083  | 3.39334E-05 | 0.02943113  | 1.804069706 |
| Crlf1     | 1.451698573 | 0.00014029  | 0.041861881 | 2.735299054 | Adgre1   | 0.836872036  | 0.000489703 | 0.075474474 | 1.786173268 |
| Kif26b    | 1.4041084   | 5.45458E-05 | 0.031448092 | 2.646541726 | Cd52     | 0.832569072  | 0.000103412 | 0.037812439 | 1.780853787 |
| Ckap2l    | 1.330827152 | 1.4315E-06  | 0.003448794 | 2.515468549 | Aldh3b1  | 0.826351599  | 3.70447E-05 | 0.03089389  | 1.773195491 |
| Cd300lf   | 1.329974215 | 3.91231E-05 | 0.031448757 | 2.513981817 | Cthrc1   | 0.814819765  | 0.000295344 | 0.060414591 | 1.759078378 |
| Gdf15     | 1.313397121 | 9.01627E-05 | 0.037596122 | 2.48526057  | Cd14     | 0.81470148   | 0.000282809 | 0.05953539  | 1.758934159 |
| Spdl1     | 1.299908971 | 0.000591835 | 0.084985095 | 2.46213347  | Pltp     | 0.812721738  | 0.000467082 | 0.075474474 | 1.756522111 |
| Cx3cr1    | 1.290257093 | 0.000286502 | 0.059732817 | 2.445716351 | Irf5     | 0.812022348  | 0.000453884 | 0.075126489 | 1.755670791 |
| Bcl2a1b   | 1.279942942 | 6.24598E-06 | 0.011285962 | 2.428293728 | Pirb     | 0.810185353  | 0.000166803 | 0.045782214 | 1.753436705 |
| Pldc1     | 1.279689019 | 0.000777849 | 0.098632164 | 2.427866373 | Ftl1     | 0.799837161  | 0.00064874  | 0.086373158 | 1.740904617 |
| Sirpb1c   | 1.264338944 | 0.000644354 | 0.086373158 | 2.40217115  | Was      | 0.797860502  | 0.000102168 | 0.037812439 | 1.738521011 |
| Il1rn     | 1.238865596 | 0.000239893 | 0.056932649 | 2.360128802 | Sin3caf  | 0.788145015  | 7.84813E-05 | 0.035529994 | 1.726852686 |
| Sox4      | 1.231543589 | 6.30181E-09 | 6.83211E-05 | 2.348180955 | Anln     | 0.787410972  | 0.000175492 | 0.04697762  | 1.725974287 |
| Aurkb     | 1.212065689 | 0.000190883 | 0.048693251 | 2.316691093 | Cyth4    | 0.786039576  | 0.000788604 | 0.099414475 | 1.724334392 |
| Clec4d    | 1.196445855 | 0.000143045 | 0.041914109 | 2.291743935 | Gngt2    | 0.782041279  | 0.000109864 | 0.037812439 | 1.719562173 |
| Cd72      | 1.186526759 | 8.22929E-05 | 0.03641544  | 2.276041336 | Igfbp6   | 0.773974673  | 0.00031851  | 0.062784037 | 1.709974336 |
| Nfasc     | 1.185230732 | 0.000569819 | 0.082369189 | 2.2739976   | Ilgam    | 0.767836515  | 8.22905E-06 | 0.013725424 | 1.702714454 |
| Lilr4b    | 1.184608253 | 0.000690258 | 0.090161822 | 2.273016652 | Mmp14    | 0.762944296  | 7.32983E-05 | 0.034969723 | 1.696950281 |
| Glipr1    | 1.173458573 | 5.80143E-05 | 0.031448092 | 2.255517646 | Ms4a6d   | 0.750958302  | 0.000275563 | 0.05915873  | 1.682910323 |
| Gm49339   | 1.170611589 | 5.64402E-05 | 0.031448092 | 2.251071044 | Snx20    | 0.741459565  | 0.000488941 | 0.075474474 | 1.6718664   |
| Frzb      | 1.170374212 | 3.40482E-07 | 0.001230445 | 2.250700689 | Tuba1c   | 0.730830393  | 1.5734E-05  | 0.018073585 | 1.659594054 |
| Ctss      | 1.16864278  | 0.000349188 | 0.064713179 | 2.248001159 | Gpsm3    | 0.7059351    | 0.00014839  | 0.042900641 | 1.631201605 |
| Pstpip1   | 1.158761745 | 1.16587E-05 | 0.018056756 | 2.23265718  | Ifi30    | 0.704391959  | 0.00025459  | 0.056932649 | 1.629457766 |
| Ccn2      | 1.134168525 | 7.41875E-05 | 0.034969723 | 2.194920255 | Fcgr3    | 0.702591548  | 0.000308103 | 0.061403285 | 1.627425552 |
| Lgals3    | 1.115035532 | 0.000640801 | 0.086373158 | 2.166003437 | Litaf    | 0.696689496  | 0.00019641  | 0.048951201 | 1.62078137  |
| Cdk1      | 1.113832564 | 0.000330876 | 0.0641332   | 2.164198102 | Hmg1     | 0.6795614    | 6.43406E-05 | 0.04026738  | 1.601652756 |
| Neur3     | 1.109323573 | 2.38947E-05 | 0.023099773 | 2.157444688 | Plekho1  | 0.666310048  | 0.000675041 | 0.088708538 | 1.587008712 |
| Ms4a7     | 1.106807671 | 0.000122919 | 0.038075161 | 2.153685621 | Arrb2    | 0.650727569  | 0.000397656 | 0.070100639 | 1.569959746 |
| Cd300c2   | 1.102187528 | 8.58767E-05 | 0.036511061 | 2.146799606 | Aprt     | 0.648037635  | 0.000121509 | 0.038075161 | 1.567035253 |
| Ubash3b   | 1.094640255 | 0.000270777 | 0.058712485 | 2.135598225 | Tpd52    | 0.635919696  | 5.70199E-05 | 0.031448092 | 1.553928039 |
| Atp1a3    | 1.091523161 | 0.000649302 | 0.086373158 | 2.130989022 | Ikbke    | 0.631447429  | 0.000528926 | 0.079643754 | 1.549118415 |
| Parvg     | 1.090906185 | 0.000199583 | 0.049176827 | 2.130077889 | Iqgap2   | 0.614766398  | 0.000379189 | 0.067950116 | 1.531310026 |
| Wfdc17    | 1.090386122 | 0.000101446 | 0.037812439 | 2.129310175 | Limd2    | 0.607409968  | 0.00045242  | 0.075126489 | 1.523521614 |
| Tnc       | 1.085979119 | 0.000608246 | 0.086373158 | 2.122815693 | Dnase2a  | 0.604207268  | 0.000187276 | 0.048436456 | 1.520143235 |
| Top2a     | 1.085710409 | 0.000333122 | 0.0641332   | 2.122420344 | Efh2d    | 0.600905852  | 0.000361545 | 0.066435362 | 1.516668567 |
| AB124611  | 1.070913958 | 1.26554E-05 | 0.018073585 | 2.100763796 | Fam49b   | 0.599712999  | 0.000645745 | 0.086373158 | 1.515415069 |
| Ly2       | 1.070197414 | 0.000252575 | 0.056932649 | 2.099720668 | Hif      | -0.618969271 | 5.40157E-05 | 0.031448092 | 0.651135963 |
| Atp8b4    | 1.065670791 | 5.11918E-05 | 0.031448092 | 2.093142874 | Sema3d   | -0.636338673 | 4.73006E-05 | 0.031448092 | 0.643343581 |
| Dpep2     | 1.061560999 | 1.04758E-06 | 0.002839344 | 2.087188643 | Negr1    | -0.702208873 | 0.000257833 | 0.056932649 | 0.614630441 |
| Orai2     | 1.051866225 | 0.000203075 | 0.049475032 | 2.073209953 | Pex11a   | -0.810678946 | 0.000490795 | 0.075474474 | 0.570113494 |
| Actg2     | 1.051164949 | 5.80384E-06 | 0.011285962 | 2.072202436 | Tppp     | -0.860030965 | 1.47568E-05 | 0.018073585 | 0.550940733 |
| Csf2ra    | 1.043455029 | 0.000633565 | 0.086373158 | 2.061157898 | Slc4a4   | -0.874341114 | 0.000259942 | 0.056932649 | 0.545502943 |
| Basp1     | 1.036689435 | 0.000474994 | 0.075474474 | 2.05151462  | Abhd6    | -0.885157676 | 0.000120073 | 0.038075161 | 0.541428345 |
| Ugt1a7c   | 1.028626129 | 0.00025757  | 0.056932649 | 2.040080567 | Ebf1     | -0.9555329   | 9.75937E-05 | 0.037812439 | 0.515650945 |
| Lrmp      | 1.019211241 | 1.58372E-05 | 0.018073585 | 2.026810546 | Hif3a    | -1.595860056 | 0.0002984   | 0.060469321 | 0.330824949 |
| Serpina3g | 1.01834632  | 5.76704E-05 | 0.031448092 | 2.025595803 | Gm10037  | -1.94192995  | 0.000105042 | 0.037812439 | 0.260268036 |
| Ltbp2     | 1.01670044  | 9.43354E-05 | 0.037812439 | 2.023286245 | Fabp3    | -2.137495076 | 0.000620785 | 0.086373158 | 0.227274058 |
| F10       | 1.015288451 | 8.53201E-05 | 0.036511061 | 2.021306991 | Phospho1 | -2.241313966 | 0.000258791 | 0.056932649 | 0.211493618 |
| Arl11     | 1.014329815 | 0.00056166  | 0.081734682 | 2.019964327 | Kcni11   | -2.794348201 | 0.00010779  | 0.037812439 | 0.144150905 |
| Tyrbp     | 0.992101862 | 0.000119198 | 0.038075161 | 1.989080772 | Sgk2     | -3.194678311 | 0.000489733 | 0.075474474 | 0.109220963 |

|         |             |             |             |             |         |              |             |             |             |
|---------|-------------|-------------|-------------|-------------|---------|--------------|-------------|-------------|-------------|
| Ddah1   | 0.991874612 | 0.000347714 | 0.064713179 | 1.988767481 | Bmp8b   | -4.242227155 | 0.000104865 | 0.037812439 | 0.052839948 |
| Lgmn    | 0.982223052 | 0.000334227 | 0.0641332   | 1.975507128 | Spopfm2 | -4.327514979 | 0.000442827 | 0.074565456 | 0.049806748 |
| Fcgr1   | 0.977848156 | 0.000558785 | 0.081734682 | 1.969525581 | Cntn1   | -4.632324321 | 0.000249897 | 0.056932649 | 0.040321013 |
| Cyp4f18 | 0.969206874 | 0.00064903  | 0.086373158 | 1.957764012 | Pnma2   | -5.461485655 | 0.000469048 | 0.075474474 | 0.022694938 |
| Tesk2   | 0.968910585 | 0.000290722 | 0.060035394 | 1.957361985 | Ppp2r2c | -5.513345586 | 0.000635161 | 0.086373158 | 0.021893621 |
| Rac2    | 0.962215876 | 0.000443617 | 0.074565456 | 1.948300047 | Trim63  | -6.884744609 | 0.000406144 | 0.071019571 | 0.00846224  |
| Dok3    | 0.953031235 | 0.000370054 | 0.066865611 | 1.935935967 | Mypn    | -7.085265575 | 7.28396E-05 | 0.034969723 | 0.007364148 |

**Supplemental Table 3. PANDORA-seq detects significantly changed sperm rsRNA and tsRNA induced by HCD feeding**

| Sequence                                     | Log2(FC) | P Value Adjusted     | Annotation |
|----------------------------------------------|----------|----------------------|------------|
| TACGGCAGCGCCGAAGGAGCCTCGTTGGCCCCGG           | 7.737179 | 0.000608             | 28S-rRNA   |
| GTGGAGCACGAGCGTACGCGTTAGGACCCGAAAGATGGTGAAC  | 7.363636 | 0.002284             | 28S-rRNA   |
| CGAGCGGTCCGCGTCCCCAACCTTCTAGAGGGGACA         | 7.314633 | 0.008506             | 18S-rRNA   |
| TACGCACGGCCGGTACA                            | 7.210977 | 0.007452             | 18S-rRNA   |
| GGGACAAGTGGCGTTCAGCCACCCGAGATTGAGCA          | 7.158858 | 0.04325              | 18S-rRNA   |
| ACGAAAGTCGGAGGTTGCAAGACGATCAGA               | 7.152217 | 0.016147             | 18S-rRNA   |
| TCCCGTGGGAGCTTGGAGGCGCTGGC                   | 7.151624 | 0.011528             | 45S-rRNA   |
| TTGGAATGAGTCCACTTTAAATCCTTTAACGAGGATC        | 7.091064 | 0.019866             | 18S-rRNA   |
| TGGCGTTCAGCCACCCGAGATTGAGCAATA               | 7.034794 | 0.006009             | 18S-rRNA   |
| TGTGAAGCAGAATTCACCAAGCGTTGG                  | 7.005126 | 0.025807             | 28S-rRNA   |
| GAACGCACGTTCTGTGGAACCTGGCGCTAGACCATT         | 6.990223 | 0.029182             | 28S-rRNA   |
| AATGTGATTTCTGCCAGTCTGGAATGT                  | 6.982574 | 0.020823             | 28S-rRNA   |
| TCCTTCTGATCGAGGCCACGCCCCTGGACGGT             | 6.973696 | 0.004625             | 28S-rRNA   |
| TTGTCTGTGTGTTGGGTC                           | 6.968994 | 0.013491             | 45S-rRNA   |
| GCAGAAAGGCAAAAGCTCGCTTGATCTGATTTT            | 6.933828 | 0.016587             | 28S-rRNA   |
| TTAATCAAGAACGAAAGTCGAGGTTCCGAAGAC            | 6.928401 | 0.019785             | 18S-rRNA   |
| GGCGAAGCCAGAGGAACTCTGGTGGAGTCCGTAGCGGCTCTGA  | 6.925182 | 0.033996             | 28S-rRNA   |
| GAGGGACAAGTGGCGTTCAGCCACCCGAGATTGAGCAA       | 6.880727 | 0.016251             | 18S-rRNA   |
| GACGGCCGGGGGCAATCGTATTGCGCCGCTAGAGGTGAAATCTT | 6.862389 | 0.014962             | 18S-rRNA   |
| AAGCTCGCTTGATCTTGATTTTACGACGAATA             | 6.77083  | 0.025265             | 28S-rRNA   |
| TGCACGCGCTACACTGACTGGCTCAGC                  | 6.757318 | 0.012363             | 18S-rRNA   |
| GAGAACTTTGAAGCCGAA                           | 6.754801 | 0.034431             | 28S-rRNA   |
| TCCTCCCGCTCCGCGCGGGGTCGGGCGCCGCGGCT          | 6.726978 | 0.007723             | 18S-rRNA   |
| AATCAGTTATGTTCTTTGGTCGCTCGCT                 | 6.723958 | 0.026952             | 18S-rRNA   |
| AGGGCAAAAGCTCGCTTGATCTTGATTTTCA              | 6.711767 | 0.033052             | 28S-rRNA   |
| TGTTAATCTAGAGCTAATACATGCGCAGCGGGC            | 6.687416 | 0.010053             | 18S-rRNA   |
| AGGGCAAGCAGATACGGCAGCGCGAAGGAGCTCGTTGGCCCCG  | 6.634378 | 0.042352             | 28S-rRNA   |
| CCCGGGGGCCGAAGCGTTTACTTTGAAAAATTAGA          | 6.61478  | 0.037421             | 18S-rRNA   |
| GAACCTGGTCGGACCGGGGAATCCGACTGTTAAT           | 6.579478 | 0.02754              | 28S-rRNA   |
| GATGTCGGGGCTGCACGCGCGCTACACTGACTGGTT         | 6.566395 | 0.026789             | 18S-rRNA   |
| ATATCTTATTGACCCAGATATATTTGATCAACGACCAA       | 6.550755 | 0.034716             | 16S-rRNA   |
| GACCTCGATGTTGATCAGGACATCCCAATGGTGTAGAAGCTAT  | 6.547439 | 0.042921             | 16S-rRNA   |
| TTTTATCCGGTAAAGCAATGATTAGAGT                 | 6.537559 | 0.048871             | 28S-rRNA   |
| TGCCGACTGGCGATGCGGCGGCTTATCCC                | 6.531319 | 0.030564             | 18S-rRNA   |
| TTGGAGGGCAAGTCTGGTGC                         | 6.525904 | 0.046509             | 18S-rRNA   |
| CCGACGCTAGGAATAATGGAATAGGACCGCGTTCT          | 6.479516 | 0.018173             | 18S-rRNA   |
| TCTTAGAGGACAAGTGGCTTCAGCCACCCGAGATTGAGCAAT   | 6.472874 | 0.048816             | 18S-rRNA   |
| TCTGCTCGGTCGAGGTTGGCGTTGAGGGTG               | 6.437727 | 0.019983             | 45S-rRNA   |
| TGCAAAAGCTGAACTTAAAGGAATTGACGGAAGGGCAC       | 6.380262 | 0.027023             | 18S-rRNA   |
| AGCTCCCTCCCGCTCCGCGCGGGGTCGGGCGCCGCGGCT      | 6.364207 | 0.04556              | 18S-rRNA   |
| TCGTCGCGCGTGGGTTCCCGGGGGGACCGCTCG            | 6.283278 | 0.037741             | 28S-rRNA   |
| TGCGGCCCGGGTTCTCCCGGGGCTACGCTGTCTGAGCGTCTG   | 6.23186  | 0.005663             | 5.8S-rRNA  |
| TAGACCATTCTGACGACCTGCTCTGGGTCGG              | 6.143321 | 0.038302             | 28S-rRNA   |
| GCGGAACGATACGGCAGCGCCGAAGGAGCTCGTTGGCCCCGG   | 6.086812 | 4.92007635833771e-05 | 28S-rRNA   |
| TGGCGCTGGAGCGTCGGGCCATACCCGCGCTCGCCGG        | 6.082484 | 0.042505             | 28S-rRNA   |
| TCTGATCGAGGCCAGCCGCTGACGGTGTGAGGC            | 6.024933 | 0.038877             | 28S-rRNA   |
| TGGATGGCGCTGGAGCGTCGGGCC                     | 6.007826 | 0.041928             | 28S-rRNA   |
| TTTGGTGTATGCTTGGCTGAGGACCAATGGGCGCAAG        | 5.976743 | 0.03059              | 28S-rRNA   |
| ATCTGCTCTGCTGAGGTTGGCGTTGAGGGTG              | 5.956908 | 0.030692             | 45S-rRNA   |
| TAACTCCCTGCCCTTTG                            | 5.829283 | 0.029645             | 18S-rRNA   |
| CCGGCCGTACCCATATCCGACGAGGTTCTCAAGGTG         | 5.69654  | 0.031139             | 28S-rRNA   |
| TAATCAAGAACGAAAGTCGAGGTTGCAAGACCA            | 5.693601 | 0.033409             | 18S-rRNA   |
| GTGGACCGGGCGTGAATGCGAGTGGCTAGTGGCCACTTTT     | 5.604064 | 0.000523             | 28S-rRNA   |
| TATTAAGTTGCTGCAGTTAAAGCTGCTAGTTGGAT          | 5.55805  | 0.026316             | 18S-rRNA   |
| AGCGTACGCGTTAGGACCCGAAAGATG                  | 5.544108 | 0.041129             | 28S-rRNA   |
| AGATACCGTCTAGTTCCGACCATAAACGATGCCGACTGGCG    | 5.502296 | 0.022095             | 18S-rRNA   |
| TTAAGCCATGCTATGTAAGTACGACCGCCGGTACAGTGAAA    | 5.49154  | 0.02575              | 18S-rRNA   |
| TTGCTCAGTTAAAAGCTGCTAGTTGGAT                 | 5.441047 | 0.019505             | 18S-rRNA   |
| GGGCCGCCCTCTCGCCCTCACGTTGAACG                | 5.434551 | 0.002837             | 28S-rRNA   |
| TAGATGCCGGGCTGCACGCGCTACACTGACTGGC           | 5.406279 | 0.033996             | 18S-rRNA   |
| TTTGGTGTATGCTTGGCTGA                         | 5.398482 | 0.035526             | 28S-rRNA   |
| TCAACCATCTAGTAGCTGGTTCCCTCCGAAGTTCCCTCAGG    | 5.388576 | 0.010485             | 28S-rRNA   |
| AGAACGAAAGTCGAGGTTCAAGACGATCAGATACCG         | 5.336231 | 0.012919             | 18S-rRNA   |
| TTTGGTGTATGCTTGGCT                           | 5.295712 | 0.011126             | 28S-rRNA   |
| AAATGGGTAAGAAGCCCGGCTCGCTGG                  | 5.254555 | 0.022522             | 28S-rRNA   |
| TGTTGGAGCGAATTTGCTGGTTAATCCG                 | 5.237982 | 0.023898             | 18S-rRNA   |
| GCTCTGGTCGAGGTTGGCGGTTGAGGGT                 | 5.226543 | 0.013604             | 45S-rRNA   |
| TGGCCGTTCTAGTTGGTGGAGCGATTGCTGTTAATCC        | 5.216827 | 0.035737             | 18S-rRNA   |
| TTGACCAACACGGGAAACCTCACCCGCGCCGACACGGACAGG   | 5.194224 | 0.012919             | 18S-rRNA   |
| TAAATGGGTAAGAAGCCCGGCTCGCTGGC                | 5.163271 | 0.042842             | 28S-rRNA   |
| GCCCGGGTGCCTGCTCTCGGGGTCGGGGGTC              | 5.101372 | 0.045534             | 28S-rRNA   |
| TGTCGCCGCTGTGGGGGAAAC                        | 5.087428 | 0.003896             | 28S-rRNA   |
| TGCTCTCCCGCACCCATCCCGCCGGCTGCGCTTTCTAC       | 4.968741 | 0.029286             | 45S-rRNA   |
| GGGGGCCAAGTCTTCTGATCAGAGCCGACCCCGTGGACGGT    | 4.95743  | 0.013423             | 28S-rRNA   |
| TTGATCTGCTCTCGGGACGGGACCGTTCT                | 4.928574 | 0.034122             | 45S-rRNA   |
| TGGGTCTCGACCTGGGTATAGGGGGCAAGACTA            | 4.922921 | 0.025217             | 28S-rRNA   |
| AATCGAACCATCTAGTAGCTGGTTCCCTCCGAAGTTCCCTCAGG | 4.913629 | 0.04767              | 28S-rRNA   |
| TATGTGCTTGGCTGAGGACCAATGGGGCGAAG             | 4.852284 | 0.00724              | 28S-rRNA   |

|                                              |          |          |           |
|----------------------------------------------|----------|----------|-----------|
| GCAGGAGGTGTCAGAAAAGTTACCACAGGGATAA           | 4.83689  | 0.038732 | 28S-rRNA  |
| TTGCAATAACAGGTTCTGTATGCCCTTAGATGTCCGGGG      | 4.832397 | 0.001065 | 18S-rRNA  |
| TTCTGATCGAGGCCAGCCCGGGTGGACGGTGTGAGGC        | 4.810624 | 0.004404 | 28S-rRNA  |
| TATATAAAGTTGCTGCAGTTAAAAGCTCTAGTTGGAT        | 4.74591  | 0.028853 | 18S-rRNA  |
| TGAGTGTCCCGGGCCGGAAGCGTTTACTTTGAAAAAATTAG    | 4.744737 | 0.003453 | 18S-rRNA  |
| TTGACTCAACACGGGAAACCTCACCCGGCCGGACACGGACAG   | 4.729382 | 0.00121  | 18S-rRNA  |
| TTTACTCAACACGGGAAACCTCACCCGGCCGGACACGGACA    | 4.684663 | 0.019459 | 18S-rRNA  |
| TGGGGGCCCAAGTCTTCTGATCG                      | 4.681307 | 0.023898 | 28S-rRNA  |
| TCGCGGGCCCGGGTGAATAACCACTACTCTCATCGT         | 4.653874 | 0.046182 | 28S-rRNA  |
| CGGACCTCAGATCAGACGTGGCGACCCGCTGGATTAAAGCAT   | 4.649539 | 0.023879 | 28S-rRNA  |
| TTGACAGATTGATAGCTTTTCTCGATTCCGT              | 4.644106 | 0.013423 | 18S-rRNA  |
| TGCCCTTAGATGTCCGGGGTGCACGCGCTACACTGACTGGCT   | 4.622184 | 0.00114  | 18S-rRNA  |
| TTTACCTACTGATGATGTTGTTGCCATGGTAATCCTGCT      | 4.61841  | 0.045429 | 28S-rRNA  |
| GCGCGCTACACTGACTGGCTCAGCTGTGCTTACCCTACGCGCGG | 4.559556 | 0.012919 | 18S-rRNA  |
| TGTGGTAATCTAGAGCTAATACATGCCGAC               | 4.493104 | 0.005602 | 18S-rRNA  |
| ATTGTGAAGCAGAATTCAACAAGCGTTGG                | 4.484694 | 0.040351 | 28S-rRNA  |
| CGTCCCGCTTCCCTGGGGGGGACCCGCGCTGTGGGCT        | 4.479907 | 0.045389 | 45S-rRNA  |
| TGAGTGTCCCGGGCCGGAAGCGTTTACTTTGAAAAAATTAGA   | 4.463454 | 0.020801 | 18S-rRNA  |
| TTATGTTCTTGGTCTGCTCTCTCTACTTGGATAACT         | 4.447297 | 0.048533 | 18S-rRNA  |
| TCAAGAACGAAAGTCGGAGGTTCAAGACGATCAGATACCGTCTG | 4.430236 | 0.0398   | 18S-rRNA  |
| AAGGAGTCTAACGGTGGCGG                         | 4.429081 | 0.032156 | 28S-rRNA  |
| GTTGGATCTGGGAGCGGGCGGGTCCCGCCGAGGCGAG        | 4.404915 | 0.044627 | 18S-rRNA  |
| ATGGCTCCGTTGCCCTCGGCGATCGAAAGGGAGTCGGGTT     | 4.398194 | 0.011497 | 28S-rRNA  |
| TCTGCTCTGGTCAAGGTTGGCGTTGAGGGT               | 4.34297  | 0.001447 | 45S-rRNA  |
| TCCCGACCCGGGAGGTAGTACGAAAA                   | 4.326298 | 0.033772 | 18S-rRNA  |
| GGTAGTCGCGTGCCTACCATGGTGACACCGGTGACGGGGA     | 4.323368 | 0.041424 | 18S-rRNA  |
| CGAGCGGTGGCGTCCCAACTTCTTAGAGGGACAA           | 4.265185 | 0.024989 | 18S-rRNA  |
| AAAGCGAATGATTAGAGGCTTGGGGCCGA                | 4.257457 | 0.041013 | 28S-rRNA  |
| TGGGGGAACTCCGCGTGGGTTTCCCGCGCGG              | 4.239694 | 0.008515 | 28S-rRNA  |
| TGGCTCCGTTGCCCTCGGCGATCGAAAGGGAGTCGGGTT      | 4.232505 | 0.001847 | 28S-rRNA  |
| TTAAATGGGTAAGAAGCCCGGCTCGCTGGC               | 4.202876 | 0.034388 | 28S-rRNA  |
| TGCTTGGTCAAGGTTGGCGTTGAGGGTGT                | 4.193972 | 0.006316 | 45S-rRNA  |
| CAGACCTGAAAGCGGGCCCTCACGATCTTCTGA            | 4.193467 | 0.013867 | 28S-rRNA  |
| TTGAGCAATAACAGGCTCTGTATGCCCTTAGATGTCGGGG     | 4.17802  | 0.017229 | 18S-rRNA  |
| AGGGATAACTGGCTGTGGCGGCAAGCGTTCATAGCGACGTGCG  | 4.174676 | 0.003017 | 28S-rRNA  |
| TCGTAGACGACCTGCTTCTGGGTCGGGTTTCGTACGTAGCA    | 4.170671 | 0.032156 | 28S-rRNA  |
| TATGTCTTGGCTGAGGAGCCAATGGGGCGAAGCTACCATCT    | 4.154111 | 0.001443 | 28S-rRNA  |
| TGGTTGACTGTCTCGCCGGTGTGCGCTTCTCT             | 4.136217 | 0.040984 | 45S-rRNA  |
| TCAAGAACGAAAGTCGGAGTTCGAAGACGATCAGATACCGTC   | 4.133327 | 0.001606 | 18S-rRNA  |
| TGGATGGCGCTGGAGCGTGGGGCCATCCCGCGTCCCGG       | 4.113493 | 0.008842 | 28S-rRNA  |
| TGGATGGCGCTGGAGCGTGGGGCCATCCCGCGTCCG         | 4.103832 | 0.000755 | 28S-rRNA  |
| TCGAACCATAGTAGCTGGTTCCCTCCGAAGTTCCCT         | 4.0907   | 0.012245 | 28S-rRNA  |
| GACCGCGTCTAATTTTGTGGTTTCGGAACCTG             | 4.077837 | 0.037872 | 18S-rRNA  |
| CTCCGGGACAGTCCAGGTGGGGAGTTTGA                | 4.022072 | 0.020104 | 28S-rRNA  |
| GTCTTCTGATCGAGGCCAGCCCGTGGACGGTGTGAGCCGGT    | 3.986362 | 0.047479 | 28S-rRNA  |
| TTCTTTGGTGGCTCGCTCTCTCTACTTGGATAACT          | 3.977479 | 0.008442 | 18S-rRNA  |
| ACCGGACCTCAGATCAGACGTGGCGACCCGCTGAATTAAGCAT  | 3.962956 | 0.004767 | 45S-rRNA  |
| TTCTGATCGAGGCCAGCCCGTGGACGGTGTGAGGCCG        | 3.953766 | 0.012742 | 28S-rRNA  |
| TGGAGCGATTGTCTGGTTAATCCG                     | 3.949428 | 0.043574 | 18S-rRNA  |
| GTCTTCTGATCGAGGCCAGCCCGTGGACGGTGTGAGCCGG     | 3.946304 | 0.015572 | 28S-rRNA  |
| TGGATGGCGCTGGAGCGTGGGGCCATCCCGCGCT           | 3.944652 | 0.001176 | 28S-rRNA  |
| AAACGCGGAAACCTCACCCGGCCGACACGGACACA          | 3.919594 | 0.0336   | 18S-rRNA  |
| TAATCAAGAACGAAAGTCGGAGGTTCAAGACGATCAGATACC   | 3.906731 | 0.012919 | 18S-rRNA  |
| TTGACGCACTTCTGTGGAACTGGCGTAGACCA             | 3.895381 | 0.037406 | 28S-rRNA  |
| TTGACTCAACACGGGAAACCTCACCCGGCCGGACACGGACAGG  | 3.889922 | 0.035991 | 18S-rRNA  |
| TGGATCTTGGGGCGGGCGGGCTCCCGCGAGGCCGA          | 3.865695 | 0.019499 | 18S-rRNA  |
| TTGGTGGAGCGATT                               | 3.851872 | 0.048812 | 18S-rRNA  |
| TTTAAATGGGTAAGAAGCCCGCTCGCTGGC               | 3.848112 | 0.034631 | 28S-rRNA  |
| GCAGGTTCCAAGGTGAACAGCCTCTGGCATTTGGAA         | 3.811799 | 0.025265 | 28S-rRNA  |
| TCTTGGGAGCGGGCGGGCGGTCGCGCCGAGGGCA           | 3.805734 | 0.031646 | 18S-rRNA  |
| AAATCGGTCGTCCGACTGGGTATAGGGCGGAAAGACTA       | 3.784213 | 0.001817 | 28S-rRNA  |
| TAGGAATAATGAATAGACCGGTTCT                    | 3.767646 | 0.039895 | 18S-rRNA  |
| TAGCTGGCGCTCTGCTCCCGACGTACGAGTTTATCCG        | 3.757857 | 0.002468 | 28S-rRNA  |
| GTTGGATCTGGGAGCGGGCGGGCTCCCGGAGGCGAGT        | 3.751806 | 0.02659  | 18S-rRNA  |
| TAGTCCGACATAAACGATGCCGACTGGCGATGCGGCGGGCT    | 3.745005 | 0.04208  | 18S-rRNA  |
| GAGGGGCTCGCTTCTGGCGCAAGCGTCCGCTCCCGG         | 3.729077 | 0.041226 | 28S-rRNA  |
| TGGGGCGAAGCTACCATCTGTGGGATTATGACTGAACGCT     | 3.724819 | 0.006368 | 28S-rRNA  |
| TAGTGGCGCTCTGCTCCCGACGTACG                   | 3.722533 | 0.025265 | 28S-rRNA  |
| TGACTTAGATAACCTCGGGCCGATCGCACGCC             | 3.721409 | 0.005134 | 18S-rRNA  |
| TCGTCCGCGCTCGGGTCCCGGGGGACCGT                | 3.714565 | 0.004106 | 28S-rRNA  |
| TTTGTACACACCCCGCTCGCTACTACCG                 | 3.712593 | 0.036736 | 18S-rRNA  |
| TAGACGACTGCTTCTGGGTCGGGTTTCTGTACG            | 3.696022 | 0.009495 | 28S-rRNA  |
| TTAATGTAATTGCAGGACACATTGATCATGACACTT         | 3.679714 | 0.014622 | 5.8S-rRNA |
| CTGCTTGGTCGAGGTTGGCGGTTGAGGGTGTG             | 3.672768 | 0.011426 | 45S-rRNA  |
| TTGCGTTGATTAAAGTCCCTGCCCTT                   | 3.665351 | 0.008842 | 18S-rRNA  |
| GAACGAAAGTCGGAGGTTCAAGACGATCAGATACCG         | 3.647831 | 0.031932 | 18S-rRNA  |
| ACGCAAGTGTCTAAGCGGAGCTCAGGGAGGA              | 3.631979 | 0.046367 | 28S-rRNA  |
| TGGCGCGGGGGGGGGGGGGGGGGTGGGGT                | 3.631449 | 0.024214 | 28S-rRNA  |
| TATGGTTCTTTGGTCTGCTCTCTCTACTTGGATAACT        | 3.630112 | 0.007607 | 18S-rRNA  |
| TGGCCGTTCTTAGTTGGTGGAGCGATTGTCTGTGTTAATCCG   | 3.60917  | 0.013423 | 18S-rRNA  |
| TGCTTGGCTGAGGACCAATGGGGCGAAGCTACCATCTGTGGGA  | 3.60862  | 0.004803 | 28S-rRNA  |
| TGCGGCCCGGGTTCTCCCGGGGTACGCTGTGAGCGTCCG      | 3.605622 | 0.003615 | 5.8S-rRNA |

|                                                |          |          |          |
|------------------------------------------------|----------|----------|----------|
| TTAGACCGTCTGAGACAGGTAGTTTTACCCTACTGATGATGT     | 3.593303 | 0.039895 | 28S-rRNA |
| CGCGGCTACTACTGACTGGCTCAGCGTGTGCCTACCTACGCCGG   | 3.585925 | 0.022365 | 18S-rRNA |
| GTGGAGCCGGCGTGGGAATGCGAAGTGCCTAGTGGGCCACTTTTG  | 3.56926  | 0.00516  | 28S-rRNA |
| TGGTTCCTTTGGTCGCTCGCTCTCTACTCTGAT              | 3.561053 | 0.03632  | 18S-rRNA |
| TGAGGAGCCAATGGGGCAGCTACCTACTGTGGGATT           | 3.560899 | 0.023826 | 28S-rRNA |
| TCGGGACCGGGTCCGGTGCAGAGACC                     | 3.556033 | 0.043529 | 28S-rRNA |
| TAACGCAGGTGCTTAAGCGAGCTCAGGGAG                 | 3.5459   | 0.005545 | 28S-rRNA |
| TACATGCCGACGGCGCTGACCCCTTCCGGGGGGGG            | 3.536489 | 0.020823 | 18S-rRNA |
| TAACAGTCTGTGATGCCCTTAGATGCCGGGG                | 3.524857 | 0.001817 | 18S-rRNA |
| TGGATCTTGGAGCGGGCGGGCGGTCCCGCCGAGGCCG          | 3.52098  | 0.023879 | 18S-rRNA |
| AGGGCAAAGCTCGCTTGATCTTGATTTT                   | 3.503119 | 0.022365 | 28S-rRNA |
| TTGTGAAGCAGAATCACCAAGCGTTGG                    | 3.496175 | 0.005802 | 28S-rRNA |
| TGGATGGTTAGTGAGCCCTCGGATCGCCCGCGGGGTCGGC       | 3.490415 | 0.019407 | 18S-rRNA |
| CGCGACCTCAGATCAGACGTGGCGGCCCTGAAATTAAGCAT      | 3.482188 | 0.023204 | 28S-rRNA |
| TGTGCTTGGCTGAGGACCAATGGGGCAGCTACCATCT          | 3.481208 | 0.004292 | 28S-rRNA |
| TACACTGTCAAACGGTAACGAGGTGTCTCAAGGCGAGCT        | 3.470919 | 0.022031 | 28S-rRNA |
| GGCGGCGTCCGGTGAAGCTCTCGCTGCGCCCTTGAAAATCCGGGG  | 3.470915 | 0.017263 | 28S-rRNA |
| TCCGGGGCTGCACGCGCTACACTGACTGCTCA               | 3.453262 | 0.035737 | 18S-rRNA |
| GTGGAGCCGGCGTGGAAATGCGAGTGCCTAGTGGGCCACTTT     | 3.444203 | 0.045644 | 28S-rRNA |
| TTATGTTCTTTGGTCTGCTCTCTCTACTTGGATAA            | 3.442569 | 0.038431 | 18S-rRNA |
| CGTTGAACGCACGTTCTGTGGAACCTGGCGTAGAC            | 3.439959 | 0.044528 | 28S-rRNA |
| AACCTCCCGTGGAGCAGAAAGGCAAAGCTCGCTTGAT          | 3.438721 | 0.009826 | 28S-rRNA |
| TACTTGGATGGGAGACCGCTGGGAATACCGG                | 3.434591 | 0.007531 | 5S-rRNA  |
| CTGAGTGTCCCGGGGGCCGAAAGCGTTACTTTGAAAAAT        | 3.434533 | 0.025265 | 18S-rRNA |
| TTAGTGACCGCATGAATGGATGAACGAGATCCAC             | 3.424672 | 0.02383  | 28S-rRNA |
| TGTGCTTGGCTGAGGACCAATGGGGCAGCACTCATCTGT        | 3.419245 | 0.023227 | 28S-rRNA |
| TTCTTTGGTCTGCTCTCTCTACTTGGA                    | 3.411226 | 0.003851 | 18S-rRNA |
| TTTCTTCTAGCTATCTCCGAAAGGTTGGCGGCTCT            | 3.410155 | 0.036867 | 45S-rRNA |
| TTGACAGATTGATAGCTTTTCTGATCCGTTGG               | 3.400569 | 0.011692 | 18S-rRNA |
| CGCGACCTCAGATCAGGCGTGGCGACCGCTGAAATTAAGCAT     | 3.38868  | 0.025663 | 28S-rRNA |
| TGGTAAGAAGCCCGCTCGCTGTC                        | 3.384478 | 0.013491 | 28S-rRNA |
| TGGGAGACCGCTGGGAATACCGGGTGTCTG                 | 3.382712 | 0.031437 | 5S-rRNA  |
| TTACCTACTGATGATGTTGTTGCCATGTAATCCTGCT          | 3.375243 | 0.031534 | 28S-rRNA |
| GCTCTGCTCAGGTTGGCGGTTGAGGGTGTGC                | 3.362104 | 0.006736 | 45S-rRNA |
| AGCCACCCGAGATTGAGCAATAACAGGCTGTGTG             | 3.361671 | 0.022166 | 18S-rRNA |
| TGGAGCACGAGCGTACGCTTAGACCCGAAAGATG             | 3.360251 | 0.006415 | 28S-rRNA |
| CGGAAACCTCACCCGGCCCGGACGACAGGATTAGCAG          | 3.354298 | 0.047479 | 18S-rRNA |
| GACAGCAGGACGGTGGCCATGGAAAGTCTG                 | 3.354239 | 0.043565 | 28S-rRNA |
| CGCGACCTCAGATCGGACGTTGGCGACCGCTGAAATTAAGCAT    | 3.351189 | 0.019499 | 28S-rRNA |
| AACGAGGTGTCTTAAGGCGAGCTCAGGGAGGA               | 3.348039 | 0.006707 | 28S-rRNA |
| GCAGAGCAGCTCCCTCGCTGCGATCTATTGAAAGTCAGCCCTCGA  | 3.334592 | 0.041506 | 28S-rRNA |
| AACGAGGTGTCTTAAGGCGAGCTCAGGGAG                 | 3.333309 | 0.043913 | 28S-rRNA |
| GAACGAAAGTCGAGGTTTCAAGACGATCAGATACCGCTC        | 3.330349 | 0.027254 | 18S-rRNA |
| TTTTGTGGTTTTCGGAACCTGAGCCATGATTAAGAG           | 3.325901 | 0.029645 | 18S-rRNA |
| CTGGCTCAGCGTGTGCCTACCTACGCCGG                  | 3.319223 | 0.021545 | 18S-rRNA |
| AGAAAACCTCCGTTGGAGCAGAAAGGCAAAAGCTCGCTTGATCTTG | 3.312328 | 0.011528 | 28S-rRNA |
| TTGACGGAAGGGCACCCAGGA                          | 3.299208 | 0.020774 | 18S-rRNA |
| TTGAACCCATTCTGATGGGGATCGGGATTG                 | 3.29542  | 0.0097   | 18S-rRNA |
| ACGGGAAACCTCACCCGGCCCGGACACGAGCAGG             | 3.292554 | 0.002421 | 18S-rRNA |
| ATAGCGACGCTGCTTTTGTATCTTCG                     | 3.28242  | 0.01607  | 28S-rRNA |
| TGCCCTTAGATGTCCCGGGCTGCACGGCCGTACACTGACTGG     | 3.277951 | 0.005802 | 18S-rRNA |
| GTTCCTTTGGTCTGCTCTCTCTCTACTTGGATAACT           | 3.27493  | 0.042518 | 18S-rRNA |
| TGAGTGTCCCGGGGGCCGAAAGCGTTACTTTGAAAAAT         | 3.251937 | 0.042267 | 18S-rRNA |
| AATCGGTCTGCGACCTGCGTATAGGGGGCAAAGAC            | 3.247797 | 0.034478 | 28S-rRNA |
| ACGGACCAAGGAGTCTAACCGTGCAGCA                   | 3.246547 | 0.006209 | 28S-rRNA |
| TCGTCCGCCGCTGGGGTCCCGGGGGGA                    | 3.245211 | 0.032614 | 28S-rRNA |
| TTGGCTGAGGAGCCAATGGGGCGAAAGTACCATCTGTGGGA      | 3.243014 | 0.049283 | 28S-rRNA |
| ACCTCCCGTGGAGCAGAAAGGCAAAGCTCGCTTGATCTTG       | 3.232278 | 0.034517 | 28S-rRNA |
| TGCGTTGATTAAGTCCCTGCCCTTTG                     | 3.229621 | 0.02497  | 18S-rRNA |
| TTGAACGCACGTTCTGTGTGGAACTGGCGCTAGACCATTC       | 3.229544 | 0.019543 | 28S-rRNA |
| CGCAGGTCTCTAAGGCGAGCTCAGGGAGGA                 | 3.226937 | 0.031957 | 28S-rRNA |
| TGAACGCACGTTCTGTGTGGAACTGGCGCTAGACCATTC        | 3.22646  | 0.012919 | 28S-rRNA |
| AAGAACGAAAGTCGAGGTTTCAAGACGATCAGATACCGCTC      | 3.216448 | 0.010599 | 18S-rRNA |
| AGTGACGCGATGAATGGATGAA                         | 3.206358 | 0.044397 | 28S-rRNA |
| GACCGGGTTCTATTTTGTGGTTTCCGGAA                  | 3.203409 | 0.014428 | 18S-rRNA |
| TAACGCAGGTGCTCTAAGGCGAGCTCAGGGAGGA             | 3.197635 | 0.006147 | 28S-rRNA |
| TGGATCTTGGAGCGGGCGGGCGTCCCGCCGAGGCGA           | 3.194025 | 0.011157 | 18S-rRNA |
| TGGCCGTTCTTAGTTGGTGGAGCGATTGTCTGGTTAATCCGA     | 3.191886 | 0.040763 | 18S-rRNA |
| CCCTTAGATGTCCGGGGCTGCACGGCCGTACACTGACTGGCT     | 3.160547 | 0.019983 | 18S-rRNA |
| GTCTTCTGATCGAGGCCAGCCCGTGGACGGTGTGAGGCCG       | 3.159774 | 0.023246 | 28S-rRNA |
| AACTTTAAATGGGTAAGAAGCCCGCTCGCTGGC              | 3.153711 | 0.022713 | 28S-rRNA |
| TGTTGCTCGCTCTCTCTACTTGGATAA                    | 3.153181 | 0.047005 | 18S-rRNA |
| TCTAAGTACGCACGCCGCTACAGTGAACCTGCAATGGCT        | 3.147269 | 0.034431 | 18S-rRNA |
| AGTTGATCTTGGGAGCGGGCGGGCGTCCGCCGAGGCGGA        | 3.141113 | 0.020823 | 18S-rRNA |
| TGCCCTTTGTACACACCGCCGCTGACTACCG                | 3.130652 | 0.020774 | 18S-rRNA |
| TGTGCTTGGCTGAGGACCAATGGGGCGAAAGTACCATCTGTGGG   | 3.120414 | 0.006209 | 28S-rRNA |
| TTGGATCTTGGGAGCGGGCGGGCGTCCCGCGAGCGAGT         | 3.117444 | 0.014652 | 18S-rRNA |
| AAGGAGTCTAACCGTGCAGCA                          | 3.116505 | 0.005642 | 28S-rRNA |
| CGGACCTCAGATCAGACGTTGGCGACCGCTGAAATTAAGCATA    | 3.094274 | 0.018596 | 28S-rRNA |
| TCCTTCTGATCGAGGCCAGCCCGTGGACGGTGTGAGGCCGG      | 3.091946 | 0.010954 | 28S-rRNA |
| TTAGACCGTCTGAGACAGGTAGTTTTACCCTACTGA           | 3.081182 | 0.020723 | 28S-rRNA |
| TGCGTCCCGCTTCCCTGGGGGGACCCGGCGTGTGGGC          | 3.077536 | 0.023322 | 45S-rRNA |

|                                               |          |          |           |
|-----------------------------------------------|----------|----------|-----------|
| TTTGTACACACCGCCCGTCTACTACCGA                  | 3.06747  | 0.019983 | 18S-rRNA  |
| TCGTGCGCCGTCGGGTCGGGGGGGAC                    | 3.062191 | 0.022131 | 28S-rRNA  |
| TGATTAAGTCCCTGCCCTTT                          | 3.055889 | 0.010954 | 18S-rRNA  |
| TGGCTCTAAGGGCTGGGTCGGTCTGGGTCGGGCGCAAGCGG     | 3.048375 | 0.036434 | 28S-rRNA  |
| TGGCTCTAAGGGCTGGGTCGGTCTGGGTCGGGCGCAAGCGGG    | 3.04488  | 0.024816 | 28S-rRNA  |
| TGCCAGGTGGGGAGTTTGA                           | 3.038915 | 0.028758 | 28S-rRNA  |
| TGCGTCGATGAAGAACGACGAGTAGCTGCGA               | 3.037224 | 0.044528 | 5.8S-rRNA |
| AAACGCTAACGACAGGTGTCTTAAGGCGAGCTCAGGAGGAC     | 3.026075 | 0.035457 | 28S-rRNA  |
| TTTGACTCAACACGGGAAACCTCACCCGGCCCGACACGGACAG   | 3.017111 | 0.02568  | 18S-rRNA  |
| TATGGTTCCTTTGGTCGTCGCTCTCTCTACTTGGATAA        | 3.014088 | 0.028571 | 18S-rRNA  |
| AAGAACAAGTCGAGGTTTCAAGACGATCAGATACCGTCGTA     | 3.013195 | 0.028346 | 18S-rRNA  |
| TAGACAGCAGGACGGTGGCCATGGAAGTCGGAATCCG         | 3.006218 | 0.026607 | 28S-rRNA  |
| TGTGGGGGACCCCTCCGCTCGGT                       | 2.990172 | 0.026352 | 28S-rRNA  |
| TTTTTCGAACTGAGGCCATGATTAAGAGGGACGGCCGGGG      | 2.976628 | 0.008583 | 18S-rRNA  |
| TGCCGACTGGCGATGCGGCGGCTTATCCATGACCCCGCCGGG    | 2.976446 | 0.033281 | 18S-rRNA  |
| CGCGACTCAGATCAGACGTCGGCACCCTCGTAATTAAGCAT     | 2.965561 | 0.023135 | 28S-rRNA  |
| TTCTTTGGTCGCTCGCTCTCTCTACTTGGATAA             | 2.965547 | 0.046509 | 18S-rRNA  |
| TAAAGCAATGATTAGAGGCTTGGGGCCGAAA               | 2.964634 | 0.034431 | 28S-rRNA  |
| TAGCAGCTCGCTTTTATGATCCTCG                     | 2.957591 | 0.039647 | 28S-rRNA  |
| TGTGCTTGGCTGAGGAGCCAATGGGCGCAAGCTACCAT        | 2.956547 | 0.010954 | 28S-rRNA  |
| TGGTTCCTTTGGTCGCTCGCTCTCTACTTGGATAA           | 2.950937 | 0.007924 | 18S-rRNA  |
| TCCCTCCGGCTCCGGCCGGGGTTCGGGCGCCGGCGGCTT       | 2.94695  | 0.039076 | 18S-rRNA  |
| TGCGTTGATTAAGTCCCTGCCCTTT                     | 2.924326 | 0.03507  | 18S-rRNA  |
| CACGGGAAACCTCACCCGGCCCGGACACGGACAGG           | 2.923954 | 0.042791 | 18S-rRNA  |
| TTGGTCGCTCGCTCTCTCTACTTGG                     | 2.922094 | 0.023227 | 18S-rRNA  |
| GTGCGGGGGCGCGACCCGCTCCGGGACAGTGCCAG           | 2.915512 | 0.022095 | 28S-rRNA  |
| GGTAACGCAGGTGCTTAAGGCGAGCTCAGGGAG             | 2.91395  | 0.031015 | 28S-rRNA  |
| GACAGCAGGACGGTGGCCATGGAAGTCGG                 | 2.89497  | 0.041472 | 28S-rRNA  |
| GGGGGGCCCAAGTCTTCTGATCGAGG                    | 2.894026 | 0.042055 | 28S-rRNA  |
| TTAGAGGGACAAGTGGCGTTACAGCCACCGAGATTGAGCA      | 2.891846 | 0.017804 | 18S-rRNA  |
| TCAAGAACGAAAGTCGAGGTTTCAAGACGATCAG            | 2.871888 | 0.01079  | 18S-rRNA  |
| TTCGAACGCTCGCCCTATCAACTTT                     | 2.861753 | 0.038404 | 18S-rRNA  |
| TTAAAAGCTCGTAGTTGGATCTTGGGAGCGGGCGGGCGG       | 2.853122 | 0.013447 | 18S-rRNA  |
| TCTGCTCTGTCGAGGTTGGCGGTTGAGGTTGTGC            | 2.852981 | 0.034101 | 45S-rRNA  |
| TTGCGTCCCGGCTTCCCTGGGGGGACCCGGCTCTGTGGGC      | 2.844319 | 0.04233  | 45S-rRNA  |
| TCTCGAAGCTAAGCAGGGTTCGGGCTCGTTA               | 2.827632 | 0.044397 | 5S-rRNA   |
| TTTGACTCAACACGGGAAACCTCACCCGGCCCGGACACGGACAGG | 2.815921 | 0.045711 | 18S-rRNA  |
| GGGACGGCCGGGGCATTCTGATTGCGCCGCTAGAGGTGAA      | 2.804449 | 0.035481 | 18S-rRNA  |
| AACACGGGAAACCTCACCCGGCCCGGACACGGACAGG         | 2.802967 | 0.028131 | 18S-rRNA  |
| CACGGACCAAGGAGTCTAACGCGTCGCGAGT               | 2.801661 | 0.02497  | 28S-rRNA  |
| AACAGGTCTGTGATGCCCTTAGATGTCCGGGGCTCACGCGCG    | 2.795695 | 0.047788 | 18S-rRNA  |
| TGATCCTTCGATGTCGGCTCTCTCT                     | 2.785799 | 0.04276  | 28S-rRNA  |
| AAGCGGGTAAACCGGGGAGTAACCTATGACTCTCT           | 2.779076 | 0.044627 | 28S-rRNA  |
| AGGATAGCTGGCGCTCTCGCTCCGACGATACGA             | 2.776492 | 0.032956 | 28S-rRNA  |
| AACACGGGAAACCTCACCCGGCCCGGACACGGACAG          | 2.766721 | 0.042267 | 18S-rRNA  |
| GTGGATCTTGGGAGCGGGCGGGCGTTCGGCCGAGGCCGA       | 2.760969 | 0.026346 | 18S-rRNA  |
| TGCGACGGGCGCTGACCCCTTCCCGGGGGGGG              | 2.749215 | 0.041506 | 18S-rRNA  |
| TACCGCAGCTAGGAATAATGGAATA                     | 2.738258 | 0.024401 | 18S-rRNA  |
| TTGATCCTTCGATGTCGGCTCTCTCTATC                 | 2.724361 | 0.036564 | 28S-rRNA  |
| TAAAAGCTCGTAGTTGGATCTTGGGAGCGGGCGGGCGG        | 2.721804 | 0.044262 | 18S-rRNA  |
| TCCTTCTGATCGAGGCCAGCCGTCGACGGTGTGAGGCGG       | 2.712123 | 0.016458 | 28S-rRNA  |
| ACGGGAAACCTCACCCGGCCCGGACACGGACAGGATTGACAG    | 2.710031 | 0.041506 | 18S-rRNA  |
| TTGAACGACGTTCTGTTGGAACCTGGCGCTAAACCAATC       | 2.700737 | 0.025265 | 28S-rRNA  |
| TGGGAGACCGCTGGGAATCCGGTGTCTAGGCT              | 2.697036 | 0.045833 | 5S-rRNA   |
| TGGAGCCGGCGTGAATGCGAGTGCCTAGT                 | 2.694931 | 0.008047 | 28S-rRNA  |
| TTGATTAAGTCCCTGCCCTTT                         | 2.693862 | 0.046509 | 18S-rRNA  |
| GGCGGTTTGGACGCGATGTGATTTCTGCCAGTGTCTGA        | 2.674957 | 0.009666 | 28S-rRNA  |
| TGCTCTGTCGAGGTTGGCGTTGAGGTTGTGC               | 2.669834 | 0.038127 | 45S-rRNA  |
| TAGTTGATCTTGGGAGCGGGCGGGCGTTCGGCCGAGGCCAG     | 2.666877 | 0.025704 | 18S-rRNA  |
| TGAAGGTGAAGGGCCCGCCCGGGGGCCGAGGTGGG           | 2.666849 | 0.035625 | 28S-rRNA  |
| ATCAAGAACGAAAGTCGAGGTTTCAAGACGATCAGA          | 2.663848 | 0.029157 | 18S-rRNA  |
| AGATGTCGGGGCTGCACGCGCTACACTG                  | 2.661848 | 0.040145 | 18S-rRNA  |
| TACCACCTGAACGCGCCGATCTGCTGATCTCGGAAGCTG       | 2.64116  | 0.04767  | 5S-rRNA   |
| TGGTTCCTTTGGTCGCTCGCTCTCTACTTGGATAACTG        | 2.609833 | 0.023529 | 18S-rRNA  |
| TGAGGCGGGGGGGGAGCCCGAGGGGCTCT                 | 2.604141 | 0.048346 | 28S-rRNA  |
| TCAGTCGCTGAGAGATGGCGAGTCCGTTCCGAAGGGA         | 2.602593 | 0.044627 | 28S-rRNA  |
| TTTTTCGAACTGAGGCCATGATTAAGAGGGACGGCCGGG       | 2.602005 | 0.040145 | 18S-rRNA  |
| TGGTTCCTTTGGTCGCTCGCTCTCTCTCTAC               | 2.59972  | 0.019064 | 18S-rRNA  |
| TGATCTCGAAAGCTAAGCAGGGTCCGGCCGGTTA            | 2.586608 | 0.032614 | 5S-rRNA   |
| TACCGCAGCTAGGAATAATGGAATAGGACCGCGGTTCT        | 2.585698 | 0.022376 | 18S-rRNA  |
| TTGGATCTTGGGAGCGGGCGGGCGTCCCGCGAGGCCGA        | 2.577692 | 0.04032  | 18S-rRNA  |
| TTGGTCGCTCGCTCTCTCTACTTGGATAA                 | 2.573553 | 0.042267 | 18S-rRNA  |
| AACAGGTCTGTGATGCCCTTAGATGTCGGGGG              | 2.569349 | 0.031855 | 18S-rRNA  |
| TGTCGGGGCTGCACGCGCTACACTGACTGGCT              | 2.553925 | 0.03031  | 18S-rRNA  |
| TTTCCCTCAGGATAGCTGGCGCTCTCGCTCCGACGTA         | 2.547372 | 0.0427   | 28S-rRNA  |
| TTAGACCGTCGTGAGACAGGTTAGTTTTACCTACTGATGA      | 2.529703 | 0.017021 | 28S-rRNA  |
| TGTGGGGGAACTCCGCTCG                           | 2.515768 | 0.049079 | 28S-rRNA  |
| CCGCGACCTCAGATCAGAGTGGCGACCCGCTGAATTAAGCAT    | 2.51477  | 0.046735 | 45S-rRNA  |
| TCCTTCTGATCGAGCCCGACCCGTTGAGGCGGGT            | 2.512028 | 0.025491 | 28S-rRNA  |
| TAGGAATAATGGAATAGGACCGCGTTC                   | 2.510914 | 0.041544 | 18S-rRNA  |
| TTCCGTGGGTTGGTGTGATGCCGTTCTTA                 | 2.502536 | 0.036669 | 18S-rRNA  |
| TAGATGTCGGGGGCTGACGCGCGCTACACTGACTGGCT        | 2.50225  | 0.034623 | 18S-rRNA  |



|                                              |          |          |           |
|----------------------------------------------|----------|----------|-----------|
| ACGGTAACGCAGGTGCTTAAGCGAGCTCAGGGAGGA         | 2.49713  | 0.040384 | 28S-rRNA  |
| TAGACGACCTGCTTCTGGGTCGGGTTCTGCTACGTAG        | 2.479114 | 0.033409 | 28S-rRNA  |
| TGGCGACCCGCTGAATTT                           | 2.476336 | 0.043316 | 28S-rRNA  |
| TGAAAGCGGGGCTCACG                            | 2.468253 | 0.014898 | 28S-rRNA  |
| TGTCCGGGCTGCACGCGCGCTACACTGAC                | 2.455139 | 0.041236 | 18S-rRNA  |
| GTCCCTTCTGATCGAGGCCAGCCCGTGACGGTGTGAGGC      | 2.454463 | 0.040379 | 28S-rRNA  |
| TGGAGCAGGAGCTACGCTTAGGACCCGAAAGATGGTGAAC     | 2.446141 | 0.009557 | 28S-rRNA  |
| TTCCGGGCGCTCCGGTGAAGCTCTCGCTGGCCC            | 2.441486 | 0.013984 | 28S-rRNA  |
| TTCCCTCAGGATAGCTGGCGCTCTCGCTCCGACGTACGCA     | 2.430087 | 0.029526 | 28S-rRNA  |
| TGGAGCCGGGCGTGAATGCGAGTGCCTAGTGGGCCACTTTT    | 2.422322 | 0.031139 | 28S-rRNA  |
| TACCACCTGAACGCGCCGATCTCGTGTATCTCGGAAGC       | 2.387189 | 0.035254 | 5S-rRNA   |
| TGGAACCTGGCGCTAGACCATCTGATAGCAGCTGC          | 2.386641 | 0.039647 | 28S-rRNA  |
| TTGGTCGCTCGCTCTCTCTACTTGGATAACTGTGGTAA       | 2.364803 | 0.033605 | 18S-rRNA  |
| AAATCTGCGCCGGGCGTACCATATATCCGACG             | 2.361967 | 0.04096  | 28S-rRNA  |
| TGTCCGGGCTGCACGCGCTACACTGACTGGCTC            | 2.358214 | 0.046182 | 18S-rRNA  |
| AAACGGTAACGCAGGTGCTTAAGCGAGCTCAGGGAG         | 2.328068 | 0.048374 | 28S-rRNA  |
| TATGGTCTTTTGGTCTCGCTCTCTCTACT                | 2.316014 | 0.032068 | 18S-rRNA  |
| AGTTGAACATGGGTGAGTCTCGTCTGAGAGATGGCGA        | 2.310388 | 0.026316 | 28S-rRNA  |
| TGGAGCCGGGCGTGAATGCGAGTGCCTAGTGGGCCACTTT     | 2.307224 | 0.026316 | 28S-rRNA  |
| CTCTGGTCGAGTTGGCGTTGAGGGTGTGC                | 2.249149 | 0.031534 | 45S-rRNA  |
| TCTGGCACGGTGAAGAGACATGAGAGG                  | 2.235861 | 0.02568  | 28S-rRNA  |
| TTGGTCGCTCGCTCTCTCTA                         | 2.227199 | 0.033996 | 18S-rRNA  |
| TTGTCTGGTTAATCCGATAACGAAACGACTCTGG           | 2.221548 | 0.015439 | 18S-rRNA  |
| TAGTCAGCGGAGGAAAAGAACTAAC                    | 2.214818 | 0.024672 | 28S-rRNA  |
| TTTTCGAACTGAGGCCATGATTAAGAGGGGACGGCC         | 2.209768 | 0.041506 | 18S-rRNA  |
| GGGTCTTCCCGAGTCGGGTTGCTTGGGA                 | 2.206698 | 0.046182 | 28S-rRNA  |
| TTAGTCAGCGGAGAAAAGAACTAAC                    | 2.203492 | 0.04085  | 28S-rRNA  |
| TGGAGCCGGGCGTGAATGCGAGTGCCTAG                | 2.167113 | 0.024708 | 28S-rRNA  |
| TCGCGGCCCGCGGTGAAATACCACTACTCTCATC           | 2.071401 | 0.033052 | 28S-rRNA  |
| TGGAGCCGGGCGTGAATGCGAGTGCCTAGTGGGCCACTTTT    | 2.000634 | 0.043928 | 28S-rRNA  |
| TTTGTCTGGTTAATCCGATAACGAAACGACTCTGG          | 1.983647 | 0.028853 | 18S-rRNA  |
| GTGGAGCCGGGCGTGAATGCGAGTGCCTAGT              | 1.967123 | 0.020165 | 28S-rRNA  |
| TGGAGCAGCAGCTACGCTTAGGACCCGAAAGATGGTGAAC     | 1.945309 | 0.047158 | 28S-rRNA  |
| TCGGGTCTTCCCGAGTCGGGTTGCTTGGGA               | 1.944342 | 0.039801 | 28S-rRNA  |
| AGTGCCAGGTGGGAGTTTGA                         | 1.700055 | 0.044885 | 28S-rRNA  |
| TGGAGCCGGGCGTGAATGCGAGTGCCTAGTGGGC           | 1.458571 | 0.047343 | 28S-rRNA  |
| ACGGCCATACCCTGAACGCGCCGATCTCGTCT             | -1.97267 | 0.019499 | 5S-rRNA   |
| CGGTCGGGCTGGGGCG                             | -2.00635 | 0.041236 | 28S-rRNA  |
| TACGGCCATACCCTGAACGCGCCGATCTCGTCT            | -2.01604 | 0.045187 | 5S-rRNA   |
| GGGGGCGCGCGCGCGGCGACTCTGAGACGAG              | -2.0287  | 0.037847 | 28S-rRNA  |
| CGGGGGCGCGCGCGCGGCGACTCTGAGACGAG             | -2.18539 | 0.032068 | 28S-rRNA  |
| CGGTCGGGCTGGGGC                              | -2.2103  | 0.03632  | 28S-rRNA  |
| CCTGCTGAGCGTCGC                              | -2.21681 | 0.020116 | 5.8S-rRNA |
| GGCGGGTGTGACGCGATGTGAT                       | -2.25501 | 0.025265 | 28S-rRNA  |
| GGGGGCGCGCGCGCGGCGACTCTGAGACGCG              | -2.33509 | 0.00249  | 28S-rRNA  |
| GGGGGCGCGCGCGCGGCGGCGACTCTGAGACGCG           | -2.41686 | 0.001614 | 28S-rRNA  |
| CCGGGTGCTGTAGGCTT                            | -2.43479 | 0.011796 | 5S-rRNA   |
| GGGGGCGCGCGCGCGGCGGCGACTCTGAGACGCG           | -2.46159 | 0.006218 | 28S-rRNA  |
| CGGGGGCGCGCGCGCGGCGGCGACTCTGAGACGAGC         | -2.47692 | 0.036867 | 28S-rRNA  |
| AGGACGGTGGCCATGGAAGTCCGGAATCCGCTAAGGAGTGTGTA | -2.4786  | 0.040212 | 28S-rRNA  |
| AGATCAGACGTGGCGACCCGCTGAATTTAAG              | -2.51109 | 0.03867  | 28S-rRNA  |
| CGGTCGGGCTGGGGCGC                            | -2.55948 | 0.023549 | 28S-rRNA  |
| CGCGGTTCCGCGCGCTCCGGTGAAGTCTCGCTGGC          | -2.56884 | 0.04085  | 28S-rRNA  |
| TGGGCGCGAAGCGGGG                             | -2.58459 | 0.000544 | 28S-rRNA  |
| TCGCGCGTGGGAAATGTGGCGTACGGAAGATCCA           | -2.58607 | 0.041933 | 28S-rRNA  |
| GGGGGCGCGCGCGCGGCGGCGACTCTGAGACGCG           | -2.70713 | 0.000608 | 28S-rRNA  |
| GCCTGTCTGAGCGTCGC                            | -2.76048 | 0.047875 | 5.8S-rRNA |
| CCGCGCGCGGGGAGGTGGAG                         | -2.81513 | 0.032771 | 28S-rRNA  |
| AGGTGGGAGTTTGAAGTGGGGCGTA                    | -2.82227 | 0.044262 | 28S-rRNA  |
| AGACGTGGCGACCCGCTGAATT                       | -2.85983 | 0.018802 | 28S-rRNA  |
| ACCGCCCTCCCCGCC                              | -2.88092 | 0.004946 | 18S-rRNA  |
| AAGGGCTGGGTCGGTGGGC                          | -2.93012 | 0.034081 | 28S-rRNA  |
| AGGATAGCTGGCGCTCTCG                          | -2.93583 | 0.032162 | 28S-rRNA  |
| GGTCGCGCCGTCGGG                              | -2.96741 | 0.016244 | 28S-rRNA  |
| GGGGGCGCGCGCGGCGGCGACTCTGAGACGCGA            | -2.98133 | 0.000207 | 28S-rRNA  |
| AATACCGGGTGTGTAGGCTT                         | -2.99412 | 0.042267 | 5S-rRNA   |
| ACGCTGTCTGAGCGTCGC                           | -2.99503 | 0.034266 | 5.8S-rRNA |
| GGGTGCTGAGGCTT                               | -3.02578 | 0.006717 | 5S-rRNA   |
| AAGACGGACCAAGAGCGAAAGCATTTCCGAAAGATTTTT      | -3.02593 | 0.005163 | 18S-rRNA  |
| ACGGCCCTGGCGGAGCGCTGAGAGA                    | -3.02882 | 0.01816  | 18S-rRNA  |
| ACGGGGTCGGCGGCGAC                            | -3.03958 | 0.0237   | 28S-rRNA  |
| GGGCTGGTTAGTACTTGGATGGGAGA                   | -3.0546  | 0.002364 | 5S-rRNA   |
| ATTGATCATGACACTTCAAGCAGCACTT                 | -3.08901 | 0.027023 | 5.8S-rRNA |
| CGGAAACGGAACGGGACGGGAGCGCGGGTGGCGTCTCT       | -3.10875 | 0.049425 | 28S-rRNA  |
| AAATCGGTCGTCGACCTGGG                         | -3.11786 | 0.037421 | 28S-rRNA  |
| AGCGGTGATCACTCGGCTCG                         | -3.13284 | 0.017946 | 5.8S-rRNA |
| AGCGGTGATCACTCGGCTGTGCT                      | -3.13458 | 0.044433 | 5.8S-rRNA |
| GGGGCGCGCGCGGCGGCGACTCTGGAGC                 | -3.13978 | 0.04211  | 28S-rRNA  |
| ACCACCTGAACGCGCCGATCTGCTGATC                 | -3.15654 | 0.008203 | 5S-rRNA   |
| CGGGGGCGCGCGGCGGCGACTCTGGAGC                 | -3.16274 | 0.02631  | 28S-rRNA  |
| ACTTGGATAACTGTGG                             | -3.16995 | 0.033996 | 18S-rRNA  |
| CGCGTCTGAGCGTCGC                             | -3.22934 | 0.00359  | 5.8S-rRNA |

|                                           |          |                      |           |
|-------------------------------------------|----------|----------------------|-----------|
| AGAACTGGTGGGAC                            | -3.24456 | 0.033772             | 28S-rRNA  |
| AGGGCGGGCCCGGGTGAG                        | -3.2765  | 0.028627             | 28S-rRNA  |
| CGCGGTTCCGGCGGCTCGGGTGTAGCTCTCGCTGGCCCT   | -3.28159 | 0.041544             | 28S-rRNA  |
| GGTGGAGGTCCTAGCGGCTCTGACGTG               | -3.28947 | 0.032863             | 28S-rRNA  |
| TCGATGTGGTCTCCGGAG                        | -3.30052 | 0.045089             | 45S-rRNA  |
| CGCTGGGAATACGGGGTCTGTAGGCT                | -3.33542 | 0.012959             | 5S-rRNA   |
| CGCCCGTCCCGCCC                            | -3.36839 | 0.048428             | 18S-rRNA  |
| CAGGTGGGAGTTTACTGGGGCGG                   | -3.37157 | 0.020378             | 28S-rRNA  |
| CGGCGGCGGGCGGACTC                         | -3.37586 | 0.006736             | 28S-rRNA  |
| ACGTTCTGGGGAACTGGCGCTAAACCATTCG           | -3.38724 | 0.01819              | 28S-rRNA  |
| CTGGGGCGCGAAGCGGG                         | -3.39237 | 2.70312747112557e-06 | 28S-rRNA  |
| CGCGGTTCCGGCGGCTCGGGTGTAGCTCTCGCTGG       | -3.40296 | 0.02956              | 28S-rRNA  |
| AGACGTGGCGACCCGCTGAATCTAAG                | -3.43097 | 0.033176             | 28S-rRNA  |
| ACCTGAACGCGCCGATCTCGTCTGATC               | -3.43357 | 0.024708             | 5S-rRNA   |
| AGAGAAACTCTGGTGGAGGTCGTAGCGGTCTGACGT      | -3.43984 | 0.033526             | 28S-rRNA  |
| GTGGGAACTGGCGC                            | -3.44379 | 0.019866             | 28S-rRNA  |
| AGAGAAACTCTGGTGGAGGTCGTAGCGGTCTGACGTG     | -3.44743 | 0.012722             | 28S-rRNA  |
| CCTGATCAGACGTGGCGACCCG                    | -3.44822 | 0.000997             | 28S-rRNA  |
| AGACGACCTGCCTCTGGGTCGGGGTTTCGTACGTAG      | -3.44828 | 0.048692             | 28S-rRNA  |
| ACCACCTGAACGCGCCGATCTCGTCTGATCT           | -3.44944 | 0.013796             | 5S-rRNA   |
| AGACGCGCGACCCGCTGAATT                     | -3.45337 | 0.013643             | 28S-rRNA  |
| ATTCGTGATGGGATCGGGGATTGCAATTATTC          | -3.4557  | 0.02667              | 18S-rRNA  |
| GGGAACGGGCTGGCGG                          | -3.4696  | 0.048533             | 28S-rRNA  |
| AGACGTGGCGACCCGCTGAATTTAAGCA              | -3.48032 | 0.002143             | 28S-rRNA  |
| AAGGATTGGCTTAAGGGCTGGG                    | -3.48508 | 0.028254             | 28S-rRNA  |
| GCGGGCCGCGGTGAAATACCACTACTCTGATCGTTTTT    | -3.49482 | 0.014456             | 28S-rRNA  |
| ATACCACCTGAACGCGCCGATCTCGTCTGATC          | -3.51001 | 0.028368             | 5S-rRNA   |
| AGCGGTGGCGACCCGCTGAATT                    | -3.5144  | 0.037536             | 28S-rRNA  |
| AGCGGTGGATCACTCGGCTCGT                    | -3.51541 | 0.027529             | 5.8S-rRNA |
| ACGGTGAAGAGCATGAGAGGTGTAGAA               | -3.51754 | 0.023556             | 28S-rRNA  |
| AGGGTCGGGCTGGTTAG                         | -3.54432 | 0.003525             | 5S-rRNA   |
| AGACGTAGCGACCCGCTGAATT                    | -3.57626 | 0.049439             | 28S-rRNA  |
| AGGGTCGGGCTGGT                            | -3.5889  | 0.00401              | 5S-rRNA   |
| ACCCTGAACGCGCCGATCTCGTCTGATCTCGGAAGCTAAG  | -3.60693 | 0.026458             | 5S-rRNA   |
| AGATCTCGGCGGGGCGG                         | -3.61122 | 0.014652             | 28S-rRNA  |
| CTGGGAATACGGGCTGCTGAGGCTT                 | -3.68975 | 0.023322             | 5S-rRNA   |
| CTCGGGGTCGGGGGTG                          | -3.69186 | 0.046509             | 28S-rRNA  |
| ATCGATGTGGTCTCGGA                         | -3.69338 | 0.033052             | 45S-rRNA  |
| GTTGAACCCATTCTGTGATGGGGATCGGGATTGCAAT     | -3.71245 | 0.044377             | 18S-rRNA  |
| AGTGGGCACATTTGGTAAGCAGAAGTGGCGTGGGGATGAA  | -3.71292 | 0.041662             | 28S-rRNA  |
| GGGATCCGAGGCTCTC                          | -3.71394 | 0.004448             | 28S-rRNA  |
| ACCGGGTCTGTAGGCTT                         | -3.75661 | 0.047799             | 5S-rRNA   |
| ATTCGTGATGGGATCGGGGATTGCAAT               | -3.76012 | 0.025276             | 18S-rRNA  |
| GGAAATACGGGCTGCTGAGGC                     | -3.76866 | 0.022095             | 5S-rRNA   |
| TACCTGGTTGATCTCG                          | -3.7752  | 0.003753             | 45S-rRNA  |
| CGGAAGCTAAGCAGGGTCGGGCTGGT                | -3.78048 | 0.04556              | 5S-rRNA   |
| GCGTTGAACGACGTTCTGTGGAACCTGGCGC           | -3.78942 | 0.049782             | 28S-rRNA  |
| CGATCTCGTCTGATCTCGGAAGC                   | -3.79415 | 0.012919             | 5S-rRNA   |
| AGACATGGCGACCCGCTGAATT                    | -3.79852 | 0.043529             | 28S-rRNA  |
| AAAGTCTTGGGTTCCGGGGGAG                    | -3.83659 | 0.010824             | 18S-rRNA  |
| AGGACGGTGGCCATGGAAGTCGGAATCCGC            | -3.83702 | 0.002088             | 28S-rRNA  |
| ATGAGAGGTGTAGAA                           | -3.83762 | 0.009218             | 28S-rRNA  |
| TCAGATCAGACGTGGCGACCCG                    | -3.87505 | 0.040566             | 28S-rRNA  |
| GGACGTGGCGACCCGCTGAATT                    | -3.88309 | 0.002898             | 28S-rRNA  |
| CGCCTGGGAATACCGGGTCTGTAGGCTT              | -3.8976  | 0.013752             | 5S-rRNA   |
| CGACTCTAGCGGTGGAT                         | -3.89986 | 0.039338             | 45S-rRNA  |
| GCGGGCGGGCCGGG                            | -3.92593 | 1.47539531616097e-07 | 28S-rRNA  |
| GGTGGATCACTCGGCTCGTGTGATGAAAGACG          | -3.92891 | 0.042008             | 5.8S-rRNA |
| GCGCGCCGGCCCGGGTCTTCCC                    | -3.93313 | 0.040993             | 28S-rRNA  |
| ATGGAAGTCGGAATCCGC                        | -3.96065 | 0.019459             | 28S-rRNA  |
| AACGGCGAGTGAACAGGGAAAGAG                  | -3.96561 | 0.015194             | 28S-rRNA  |
| AGACGACCCGCTTCTGGTGGGGTTTCGTACG           | -3.97336 | 0.044371             | 28S-rRNA  |
| ACGCCGTCTGAGCGTCTGCT                      | -3.98812 | 0.034122             | 5.8S-rRNA |
| GGGGCCGGCGGCGGCGGACTCTGGACGCG             | -3.98918 | 0.000159             | 28S-rRNA  |
| CGACTCTAGCGGTGGATCACT                     | -4.01032 | 0.011464             | 45S-rRNA  |
| AGACGTGGCGACCCGCGAATT                     | -4.01124 | 0.004067             | 28S-rRNA  |
| CGGGCCGGGGTGGG                            | -4.01888 | 0.001764             | 28S-rRNA  |
| ACCCTGAACGCGCCGATCTCGTCTGATCT             | -4.02167 | 0.009151             | 5S-rRNA   |
| GATCTCTGATCTGGC                           | -4.02415 | 0.040351             | 28S-rRNA  |
| AGACGACCTGCTTCTGGTGGGGTTTCGTGCGTAG        | -4.03352 | 0.032167             | 28S-rRNA  |
| ATCGACACTTCGAACGCACTTG                    | -4.03873 | 0.045936             | 5.8S-rRNA |
| CGGGCGGGCCGGG                             | -4.03881 | 8.78199340270015e-05 | 28S-rRNA  |
| CGGCGCGGGGCTCGGGTCTTCCC                   | -4.04387 | 0.025187             | 28S-rRNA  |
| CGGAACGGAAACGGGACGGGAGCGCCGCGGTGCGCTCTCGG | -4.06045 | 0.004472             | 28S-rRNA  |
| GGGGCGGGCCGGG                             | -4.06673 | 0.027924             | 28S-rRNA  |
| CTCAGATCAGACGTGGCGACCCG                   | -4.06871 | 0.000207             | 28S-rRNA  |
| ACGGCCCTGGCGAGC                           | -4.07518 | 0.001118             | 18S-rRNA  |
| AGACGACCCGCTTCTGGGTCGGGGTTTCGTACGTAG      | -4.08357 | 0.032956             | 28S-rRNA  |
| GGGGCCGGCGGCGGCGGACTCTGGACGC              | -4.09505 | 1.0467125719249e-06  | 28S-rRNA  |
| ACGGCGGACCCCTCTC                          | -4.09609 | 0.004838             | 28S-rRNA  |
| CGTCTGATCTCGGAAGCTAAGAGGGTCGGGCTGGT       | -4.09883 | 0.039709             | 5S-rRNA   |
| GCTCCGGGACGGCTGGG                         | -4.1238  | 0.023826             | 28S-rRNA  |

|                                              |          |                      |           |
|----------------------------------------------|----------|----------------------|-----------|
| CGGGTTGCTTGGGAATG                            | -4.13103 | 0.0071               | 28S-rRNA  |
| CCGGGGGCGGGCGCCGCG                           | -4.13769 | 0.007075             | 18S-rRNA  |
| GGCGGGGTGCGACGCGATGTGATTT                    | -4.13923 | 0.030243             | 28S-rRNA  |
| ACCGCCCGTCCCGGCC                             | -4.14313 | 4.06550055702131e-09 | 18S-rRNA  |
| ACTTTTGGTAAGCAGAAGCTGGCGCTGCGGGATGAAC        | -4.15625 | 0.013423             | 28S-rRNA  |
| CACGGCGCACCGCTCTCC                           | -4.16023 | 0.020774             | 28S-rRNA  |
| AGAGGAAACTCTGGTGGAGGTCGGTAGCGGTCTGACGTGCAAA  | -4.17505 | 0.025273             | 28S-rRNA  |
| CGGGCGCGGCACTCTGGACGCGAGCCCGGCC              | -4.17586 | 0.013801             | 28S-rRNA  |
| GGTGAAGAGACATGAGAGGTGTAGAATAAG               | -4.1961  | 0.04144              | 28S-rRNA  |
| CGACTCTAGCGGTGGTCACTCGGCT                    | -4.21706 | 0.02098              | 45S-rRNA  |
| AGACGACCTGCTTCTGGGTCGGGGTTCCGTACGTAG         | -4.22635 | 0.008884             | 28S-rRNA  |
| ATGAGAGGTGTAGAATAAGTGGAGGCCCGCCGCGCCCGG      | -4.23212 | 0.044268             | 28S-rRNA  |
| AGTCAGCGGAGGAGAAGAAC                         | -4.23648 | 0.008244             | 28S-rRNA  |
| GGGGCGGGCGCCGGCGG                            | -4.23962 | 1.04725860303025e-05 | 18S-rRNA  |
| CGGAACGGAACGGGACGGGAGCGGCCCGGGTGGCGG         | -4.24457 | 0.001439             | 28S-rRNA  |
| AAGTGGCGTTCAGCCACCGAGATTGAG                  | -4.25987 | 0.032956             | 18S-rRNA  |
| GCGACGAGTAGGAGGGCGCTGCGGTGAGCCTGAAGCC        | -4.28622 | 0.008506             | 28S-rRNA  |
| AGACGTGGCGACCCGTGGATT                        | -4.29371 | 0.002722             | 28S-rRNA  |
| CGGCTCCGGACCGCTGGGA                          | -4.2968  | 0.001066             | 28S-rRNA  |
| CGGACCTCAGATCAGCGGTGGCGACCCGC                | -4.30408 | 0.031456             | 28S-rRNA  |
| AGTGGGGAGTTTGAC                              | -4.32472 | 0.02707              | 28S-rRNA  |
| AGATCAGACGTGGCGACCCGCTGAATTTAAGCA            | -4.32801 | 0.025265             | 28S-rRNA  |
| CGCGCCGGGCGGGTCTTCCC                         | -4.33419 | 0.002658             | 28S-rRNA  |
| GGTGGATCACTCGGCTCGTG                         | -4.34264 | 0.005209             | 5.8S-rRNA |
| AGTGAGGCCCTCGGAT                             | -4.34413 | 0.007696             | 18S-rRNA  |
| ATGGAAGTCGGAATCCGTAAGGAGTGTGAACAACTCAC       | -4.34452 | 0.003459             | 28S-rRNA  |
| AGACGACCTGCTTCTGGGCGGGGTTTCGTACGTAG          | -4.35425 | 0.008506             | 28S-rRNA  |
| GGGGCGCGAAGCGGGG                             | -4.39728 | 1.47539531616097e-07 | 28S-rRNA  |
| GGGGCTGGGCGCGCGCCGCGCTGGA                    | -4.39967 | 0.011528             | 28S-rRNA  |
| GGCGGGCGGGCGGGG                              | -4.40921 | 9.40437129904846e-05 | 28S-rRNA  |
| AGACGTGGCGCGCCCGTGAATT                       | -4.4199  | 0.004292             | 28S-rRNA  |
| AGACGACCTGCTTCTGGGTCGGGCTTCGTACGTAG          | -4.43058 | 0.021626             | 28S-rRNA  |
| AGGGCGCGGGCGGGTGGAGC                         | -4.43068 | 0.025295             | 28S-rRNA  |
| AGGACCGTGGCCATGGAAGTCGGAATCCGTAAGGAGTGTGATG  | -4.43153 | 0.020379             | 28S-rRNA  |
| GCTGCGGGATGAACCGAACCGCGGTTAAGCGGCC           | -4.43504 | 0.015837             | 28S-rRNA  |
| AGACCGCGCGACCCGCTGAATTTAAGCA                 | -4.43806 | 0.03543              | 28S-rRNA  |
| AGACGTGGCGACCCCGTGAATTTAAGCA                 | -4.44849 | 0.022376             | 28S-rRNA  |
| CGAAGTGGAGAAGGGTTCATGTGAACAGCAGTTGAA         | -4.45718 | 0.020774             | 28S-rRNA  |
| CGGCTCCGGACCGCTGGG                           | -4.46391 | 2.07651360745009e-07 | 28S-rRNA  |
| ACGTGGACCGACGTTCTGTGTGGAACCTGGCGCTAAACCATTCG | -4.4642  | 0.030422             | 28S-rRNA  |
| ACTTGGATGGGTGACCGCTGGGAATACCGGGTCTGTAGGCTT   | -4.48542 | 0.016123             | 5S-rRNA   |
| GGCTCCGGGACGGCTGGGA                          | -4.48827 | 0.002913             | 28S-rRNA  |
| ACCGCCCGTCCCGGCC                             | -4.49602 | 0.00133              | 18S-rRNA  |
| AGGCGACCTGCTTCTGGGTCGGGGTTTCGTACG            | -4.49861 | 0.022376             | 28S-rRNA  |
| AGACGTGGCGACTCGCTGAATT                       | -4.503   | 0.031869             | 28S-rRNA  |
| AGATACCCGTCGCCGCGCTCTCT                      | -4.50733 | 0.018258             | 28S-rRNA  |
| AGACGACCTGCTTCTGGGTCGGGGTTTGTACGTAG          | -4.50946 | 0.042842             | 28S-rRNA  |
| AGGTCTCAAGGTGAACAGCCTCTGGCATGTGGAACAATGTAGG  | -4.50946 | 0.023062             | 28S-rRNA  |
| ACTTGAACCGCACTTGGCGCCCGGGTTCTCCGGGGCTACG     | -4.55158 | 0.047479             | 5.8S-rRNA |
| ACTTGTATGGGAGACCGCTGGGAATACCGGGTCTGTAGGCTT   | -4.55635 | 0.024401             | 5S-rRNA   |
| ACGTGAAACCGCACGTTCTGTGGAGCTGGCGCTAAACCATTCG  | -4.55672 | 0.023826             | 28S-rRNA  |
| GTTGCCCTCGCCGATCGAAAGGGAGTCCGGTTTCAGATCCC    | -4.57666 | 0.042771             | 28S-rRNA  |
| GGCGGGCGGGTCCCGCGGAGGCGAG                    | -4.57807 | 0.000542             | 18S-rRNA  |
| ATCGATGTGTGCTCCGAGT                          | -4.59317 | 0.012282             | 45S-rRNA  |
| AGACGTGGCGACCTGCTGAATT                       | -4.59975 | 0.002763             | 28S-rRNA  |
| ATTCGTATTGCGCCGCTAGAGGTGAAATTCCTGGAC         | -4.60909 | 0.020774             | 18S-rRNA  |
| CCGGGGCCGAGGGAG                              | -4.61819 | 3.39445030830454e-07 | 28S-rRNA  |
| GAAAATGGATGGCGCTGGAGCGTCCGGGCC               | -4.61856 | 0.032614             | 28S-rRNA  |
| CCGGGGGGCGGGCGCCGGCGG                        | -4.63921 | 0.002725             | 18S-rRNA  |
| CGGGGGCGGGGCGG                               | -4.641   | 0.000279             | 28S-rRNA  |
| GTGCGTCGATGAAGAACGACGCTAGCTG                 | -4.6644  | 0.001383             | 5.8S-rRNA |
| AGATACCCGTCGCCGCGCTCTCTCT                    | -4.69739 | 0.031576             | 28S-rRNA  |
| GGCCCTGGCGGAGCGCTGAGAAAGACG                  | -4.69988 | 0.034266             | 18S-rRNA  |
| CGGGGGCGGGGCGGGA                             | -4.70667 | 0.000214             | 28S-rRNA  |
| CGCGACCTCGGATCAGACGTGGCGACCCGC               | -4.71752 | 0.022031             | 28S-rRNA  |
| CGGACCTCAGATCAGACGCGCGGACCCGC                | -4.7192  | 0.013727             | 28S-rRNA  |
| CGACCTTAGCGGTGATCACTCGGCT                    | -4.72509 | 0.043881             | 45S-rRNA  |
| TGATCCTTCGATGTCGGC                           | -4.72565 | 0.039013             | 28S-rRNA  |
| AACGGCAGTGAACAGGGGAAGAGCCAG                  | -4.7269  | 0.005642             | 28S-rRNA  |
| AGTGGGTAAACGCGACCGATCCGAGAAAGC               | -4.744   | 0.014631             | 28S-rRNA  |
| GTTGAACGACGTTCTGTGGAACTTGGC                  | -4.74536 | 0.033467             | 28S-rRNA  |
| AGACGTGGCGACCCGCTGAATC                       | -4.75324 | 0.008244             | 28S-rRNA  |
| CGGTGATCACTCGG                               | -4.7609  | 0.004167             | 5.8S-rRNA |
| ATCGATGTGTGCTCCGAGTTC                        | -4.76111 | 0.019499             | 45S-rRNA  |
| AGACGTGGTGAACCCGCTGAATT                      | -4.76182 | 0.000609             | 28S-rRNA  |
| CTTAGATCGATGGTGTCCCG                         | -4.78544 | 0.029645             | 45S-rRNA  |
| GGCGGGCGGGGCGG                               | -4.79342 | 0.0155               | 28S-rRNA  |
| AGACGTGGTGAACCCGCTGAATTTAAGCA                | -4.79823 | 0.026956             | 28S-rRNA  |
| AGATGTGGCGACCCGCTGAATT                       | -4.80949 | 0.015313             | 28S-rRNA  |
| CGTAACCTCGGGATAAGGATTGGCTTAAGGG              | -4.82835 | 0.037933             | 28S-rRNA  |
| GATGTGATTTCTGCCAGTGTCTGAATG                  | -4.83679 | 0.026389             | 28S-rRNA  |
| CCGGGGCCGAGGGAG                              | -4.84868 | 7.09644184658536e-08 | 28S-rRNA  |

|                                            |          |                      |           |
|--------------------------------------------|----------|----------------------|-----------|
| ACTTGGATGCGAGACCGCTGGGAATACCGGGTCTGTAGGCTT | -4.8491  | 0.034081             | 5S-rRNA   |
| AGATTGATAGCTCTTTCTCGATTCCG                 | -4.85138 | 0.005209             | 18S-rRNA  |
| CAGAGGAAACTCTGGTGGAGGTCCTAGCGGTCTGACGTG    | -4.85426 | 0.005089             | 28S-rRNA  |
| AGGCGTGGCGACCCGCTGAATTAAGCA                | -4.86278 | 0.011353             | 28S-rRNA  |
| CAGGTGGGAGTTTGAAGTGGGGCGTA                 | -4.86416 | 0.011126             | 28S-rRNA  |
| AGATCAGACGTGGCGACC                         | -4.8679  | 0.005933             | 28S-rRNA  |
| AGCGGGGAAAGAACCCCTGTTGAGCTTACTACTAGTC      | -4.87146 | 0.006218             | 28S-rRNA  |
| TCCCGGGCCGAGGGAGC                          | -4.87467 | 4.45567841586272e-07 | 28S-rRNA  |
| CTCAGATCAGACGTGGCGACC                      | -4.8975  | 0.004056             | 28S-rRNA  |
| CATACCACCTGAACCGCCGATCTCGTCTGATC           | -4.89792 | 0.04325              | 5S-rRNA   |
| CGGCTCCGGGACGGCTGGG                        | -4.8984  | 8.3564578572891e-05  | 28S-rRNA  |
| AGACGACCTGCTCCGGGTCGGGGTTTCTGATC           | -4.91814 | 0.041438             | 28S-rRNA  |
| AGACGTGGCGACCCGCTAAATT                     | -4.91982 | 0.02707              | 28S-rRNA  |
| AGACGTGGCGACCCGCTGAGTTTAAAGCA              | -4.92501 | 0.034641             | 28S-rRNA  |
| CAGAGGAACTCTGGTGGAGGTCCTGACGGTCTGACG       | -4.92891 | 0.031456             | 28S-rRNA  |
| AGCCGGCTTAGAAGTGTGCGGAC                    | -4.93206 | 0.046182             | 28S-rRNA  |
| GATCTGCTGATCTCGGAAGC                       | -4.93825 | 0.000425             | 5S-rRNA   |
| AACGGCGAGTGAACAGGGGAAGGCC                  | -4.97381 | 0.00089              | 28S-rRNA  |
| AGGACCCGAAAGATGGTGAATGCTTGGCCAGGGCGAAGC    | -4.97805 | 0.003169             | 28S-rRNA  |
| GGCGGGTGTGACGCGGTGATTTCT                   | -4.98483 | 0.045426             | 28S-rRNA  |
| TCCCGGGCCGAGGGAG                           | -4.99445 | 4.01046640430286e-11 | 28S-rRNA  |
| ACCTGTGGGATTATGACTGAACCCCTCTAAGT           | -5.00165 | 0.009076             | 28S-rRNA  |
| CGTGCCTGATGAAGAAGCAGCTAGCTG                | -5.01831 | 0.046509             | 5.8S-rRNA |
| AGAGGAACTCTGGTGGAGGTCCTGATG                | -5.01868 | 0.02118              | 28S-rRNA  |
| ATGGAAGTCGGAATC                            | -5.02438 | 0.0441               | 28S-rRNA  |
| ACCCGTGCGCGCTCTCTCTC                       | -5.02988 | 0.024805             | 28S-rRNA  |
| AAGACGGACAGAGCGAAGGCATTTGCCAAGAATGTTTT     | -5.03035 | 0.038447             | 18S-rRNA  |
| AGAGGAAACCTGTGGAGGTCCTGACGGTCTGACGTG       | -5.03738 | 0.0427               | 28S-rRNA  |
| AGGGGCGAAAGACTAATCGAACCATCTAGTAGCTGGTTC    | -5.04226 | 0.020508             | 28S-rRNA  |
| GGCGCGCGCCGGCTGAGC                         | -5.06804 | 0.049299             | 28S-rRNA  |
| TGGGGTCCGCGGGGACC                          | -5.07828 | 2.09129683946319e-05 | 28S-rRNA  |
| ATCTGTGGGATTATGACTGAGCGCCTC                | -5.09142 | 0.040351             | 28S-rRNA  |
| CGTGGACGGTGTGAGGCGGTGACGGCCC               | -5.09559 | 0.034431             | 28S-rRNA  |
| ATGTTGAACGCACGTTCTGTGGAACCTGGCGC           | -5.09806 | 0.022365             | 28S-rRNA  |
| CGGGGCCGAGGGAGC                            | -5.11584 | 3.71218952310282e-05 | 28S-rRNA  |
| ACGGCGCGACCCGCTCTC                         | -5.12613 | 0.037266             | 28S-rRNA  |
| ATTGCGCCGCTAGAGGTGAAATTTCTTGGA             | -5.13241 | 0.002364             | 18S-rRNA  |
| AGGTTCCCAAGGTGAACAGCCTCTGTCATGTTGGAACAATG  | -5.13811 | 0.000114             | 28S-rRNA  |
| CCCGGGCCGAGGGGA                            | -5.14529 | 0.025117             | 28S-rRNA  |
| CTGTTGAGCTTACTC                            | -5.14896 | 0.025457             | 28S-rRNA  |
| AGACGTGGCGACAGCTGAATT                      | -5.16812 | 0.023634             | 28S-rRNA  |
| GTACGACTTATGCGGTGATCACTCGGCT               | -5.19193 | 9.79006137087332e-06 | 45S-rRNA  |
| AAGCAGGGTCCGGCCTGTTAG                      | -5.19298 | 0.000285             | 5S-rRNA   |
| AGACGTGGCGACCCGCGAATTAAGCA                 | -5.19622 | 0.009123             | 28S-rRNA  |
| GCCCGATCTCGTCTGA                           | -5.19991 | 0.0377               | 5S-rRNA   |
| AGCCTTGGCATGTTGGAACAATG                    | -5.20257 | 0.003634             | 28S-rRNA  |
| CGCGGTTCCGGCGGCTCCGGTGAAGTCTCGCTGGCCC      | -5.20369 | 0.005436             | 28S-rRNA  |
| ATGAGAGGTGTAGAATAAG                        | -5.21371 | 0.0079               | 28S-rRNA  |
| CTTTAGATGATGTTGGTCT                        | -5.22208 | 0.005642             | 45S-rRNA  |
| ACCCGTGCGCGCTCTCCCCC                       | -5.22802 | 0.004571             | 28S-rRNA  |
| TGGGTCTTCCCGAGTCCGGTTGCTTGGGAATG           | -5.22986 | 0.001309             | 28S-rRNA  |
| TGGTGCAGACCGGGGAATCCGACTGTTAATTAACAACAAG   | -5.23579 | 0.029157             | 28S-rRNA  |
| AGACGACCTGCTTCTGGGTCGGGGTTCTGATGTAG        | -5.24261 | 0.033772             | 28S-rRNA  |
| ACCGGTACTGTAGCTT                           | -5.26309 | 0.046509             | 5S-rRNA   |
| GGCTCCGGGACGGCTGGG                         | -5.29947 | 2.53097274455251e-06 | 28S-rRNA  |
| CGTGCCTGATGAGGAACGACGTAAGTCCGAGAAT         | -5.3142  | 0.022734             | 5.8S-rRNA |
| CGGGGGCGGGCGGGG                            | -5.32915 | 1.40739278656071e-06 | 28S-rRNA  |
| AGACGTGGCGACCCGCTGAATTAAGCATAT             | -5.34699 | 9.79006137087332e-06 | 28S-rRNA  |
| AGACGTGGCGACCCGTTGAATT                     | -5.35721 | 0.036749             | 28S-rRNA  |
| CGCTCCCGGCGCGCTCTGTTGGGGCCCAAGTCTTCTGAT    | -5.35956 | 8.36292796038969e-07 | 28S-rRNA  |
| AGTCCCGTGCTAC                              | -5.36768 | 0.032068             | 18S-rRNA  |
| ATTGCGCCGCTAGAGGTGAAATTTCTGGAC             | -5.41056 | 0.015615             | 18S-rRNA  |
| CGCGGTTCCGGCGGCTCCGGTGAAGTCTCTGCG          | -5.42001 | 0.019288             | 28S-rRNA  |
| GGCGGGCGGGCGGGG                            | -5.44964 | 0.003774             | 28S-rRNA  |
| CCGGGGCCGAGGGAGC                           | -5.47544 | 1.6856949737359e-07  | 28S-rRNA  |
| CGGGCGGGCGTGGGG                            | -5.47979 | 0.039066             | 28S-rRNA  |
| AGTAACGGCGAGTGAACAGGGAA                    | -5.48541 | 0.003778             | 28S-rRNA  |
| CGGGCGGGCGGTCGCGCGGAGGGCAG                 | -5.51819 | 2.9128312866596e-07  | 18S-rRNA  |
| AGAGGAGACTCTGGTGGAGGTCCTGACGGTCTGACGTG     | -5.53264 | 0.023834             | 28S-rRNA  |
| ACCCGTGCGCGCTCTCTCTCTC                     | -5.54779 | 0.038571             | 28S-rRNA  |
| CGGGGGCGGGCGGGCGGG                         | -5.57031 | 3.79994064589038e-06 | 18S-rRNA  |
| GAAGGGCCCCCGGGGGGGCCGAGGTGGGATCCGAGGCC     | -5.57142 | 0.035893             | 28S-rRNA  |
| AGACGTGGAGACCCGCTGAATT                     | -5.58801 | 0.025273             | 28S-rRNA  |
| CGGGGGCGGGCGGGGACTG                        | -5.59943 | 0.002785             | 28S-rRNA  |
| GGGTCCGGGGCGGGG                            | -5.64092 | 0.002853             | 45S-rRNA  |
| ACTGTAGCTTTTTCACTGACCCGG                   | -5.65245 | 0.003666             | 28S-rRNA  |
| GGTGGCCATGGAAGTCCGGAATCCGTAAGGAGTGTGAACAAT | -5.65349 | 0.000863             | 28S-rRNA  |
| ACCCGTGCGCGCTCTCTCTCT                      | -5.66646 | 0.021745             | 28S-rRNA  |
| ATCGATGTGTGCTCC                            | -5.67179 | 0.001939             | 45S-rRNA  |
| GCGCGCCGGCCGGGCTTCCCG                      | -5.76099 | 0.048692             | 28S-rRNA  |
| AGACGTGGCGACCCGCTGAATTAAGCATATTAGT         | -5.8151  | 0.0071               | 28S-rRNA  |
| AGTGGGCCACTTTGGTAAAGCAGAAGTCCGCTCGGGATGAAC | -5.83305 | 0.049782             | 28S-rRNA  |

|                                                |          |                      |           |
|------------------------------------------------|----------|----------------------|-----------|
| GCAGCTAGGAATAATGGAA                            | -5.83338 | 0.049439             | 18S-rRNA  |
| AGACGATCTGCTTCTGGGTCGGGGTTCTGACGTAG            | -5.84891 | 0.009076             | 28S-rRNA  |
| GGGGCGGGCGGACT                                 | -5.87203 | 0.029645             | 28S-rRNA  |
| AGGGGAATCCGACTGTTAATTAACAAACAAAG               | -5.88483 | 3.10333001629589e-05 | 28S-rRNA  |
| CGCGCCGGGGAGGTGGAGCACGAG                       | -5.88674 | 0.004167             | 28S-rRNA  |
| CTCCACCCGCGCTGTTCCCTCT                         | -5.8888  | 0.021984             | 28S-rRNA  |
| AATACCGGGTCTGTAGGC                             | -5.89277 | 0.010918             | 5S-rRNA   |
| AAATATTCAAACGAGAIACTTTGAAGGCCGAAGTGGAGAAGGGTTC | -5.89981 | 0.026966             | 28S-rRNA  |
| CGGACCTCAGATCAGATGTGGCGACCCCG                  | -5.90451 | 0.033409             | 28S-rRNA  |
| AGACGTGGCAACCCGCTGAATT                         | -5.91084 | 0.006368             | 28S-rRNA  |
| CCCGGGCCGAGGGAGC                               | -5.9136  | 3.39445030830454e-07 | 28S-rRNA  |
| GGCGGGTGTGGCGCATGTGAT                          | -5.92319 | 0.025273             | 28S-rRNA  |
| CCCGTCCCGGCTCTCCCGC                            | -5.97899 | 0.012542             | 28S-rRNA  |
| GAATCCCGGGCCGAGGGAG                            | -5.98116 | 0.043529             | 28S-rRNA  |
| TTGAAAGCGTCCGGTTCGGCGCGCTCCGGTGAGCTC           | -6.01453 | 0.030312             | 28S-rRNA  |
| CGGGTCTCCCGGAGTCGGGTGCTTGGGAATG                | -6.04032 | 1.78005794039731e-06 | 28S-rRNA  |
| GGAAGTCGGAATCCGCTAAGGAGTGTAAACAACTCA           | -6.04511 | 0.041562             | 28S-rRNA  |
| CCACCGCCCTCCCGCCC                              | -6.05203 | 0.020801             | 18S-rRNA  |
| GGACGTGGCGACCCGCTGAATTTAAGCATAT                | -6.075   | 0.005683             | 28S-rRNA  |
| GTGCTGATGAAAGAACGACGTTAGCTGCGAGAAT             | -6.0823  | 0.041651             | 5.8S-rRNA |
| AGACGGGGCGACCCGCTGAATT                         | -6.1047  | 0.045534             | 28S-rRNA  |
| AGGGGGCGGGCCGA                                 | -6.11215 | 0.030564             | 28S-rRNA  |
| CGGCGCGGGACTCTGGACGCGAGCCGGCC                  | -6.11378 | 0.001842             | 28S-rRNA  |
| CGAAACGGAAACGGGACGGGAGCGCGCGGGTGCCTGTC         | -6.13766 | 0.031456             | 28S-rRNA  |
| CGCGACGAGTAGGGGGCCGCTCGGTGAGCCTGAAGCC          | -6.17571 | 0.044885             | 28S-rRNA  |
| GGTGATCACTCGGCTCG                              | -6.19861 | 3.85800976959798e-05 | 5.8S-rRNA |
| GGCGGGTGTGACGCGATGTGATTC                       | -6.20187 | 0.011692             | 28S-rRNA  |
| CGTAGCGGTCTGACGTGCAATCGGTCTCCGACCTGGG          | -6.20939 | 0.005348             | 28S-rRNA  |
| ACCATCTGCGGGATTATGACTGAACGCTCTAAGT             | -6.2123  | 0.014384             | 28S-rRNA  |
| AGAGGAAGCTGTTGGGAGTCCGTAGCGGCTCTGACGTG         | -6.21745 | 0.04651              | 28S-rRNA  |
| CCCGGGGCGACTTCCGGGAAACCAAGTCTTTGGGTTCC         | -6.2287  | 0.048734             | 18S-rRNA  |
| ACTCCCGGGCCGCTCGTGGGGGCTAAGTCTCTGAT            | -6.29385 | 0.022944             | 28S-rRNA  |
| AGGAAACTCTGTTGG                                | -6.29556 | 0.047519             | 28S-rRNA  |
| GTCCGGGCTGCACGCGC                              | -6.29942 | 0.024241             | 18S-rRNA  |
| AGTAACGGGAGTGAACAGGGAAGAGCC                    | -6.33534 | 7.21692625529059e-06 | 28S-rRNA  |
| GATCTGCTGATCTCGGAAGCTAAG                       | -6.3557  | 0.000187             | 5S-rRNA   |
| CCTCCGGCTCCGGCGGGGGTCCGGCC                     | -6.39021 | 0.000846             | 18S-rRNA  |
| AGGACCCGAAAGATGTTGAACCTATGCTGGG                | -6.3909  | 1.64886286141753e-05 | 28S-rRNA  |
| GGGGGCGCGGGCGGGCGACTGCGGCGCG                   | -6.40247 | 0.038583             | 28S-rRNA  |
| GGGGCGCGAGCGGGG                                | -6.41373 | 0.044493             | 28S-rRNA  |
| ACGCGAGCCGGCCC                                 | -6.41463 | 0.04767              | 28S-rRNA  |
| AAGCAGAACTGGCGTCCGGGATGAACCCGAACG              | -6.46445 | 0.030564             | 28S-rRNA  |
| CCCTGAACGCGCCG                                 | -6.47641 | 0.047091             | 5S-rRNA   |
| GCGCACGGGTCCGGCGGGAC                           | -6.48921 | 0.00712              | 28S-rRNA  |
| CTCGGCGCCCTCGATGCTCTTAGCTGAGTGTG               | -6.49467 | 0.004945             | 18S-rRNA  |
| AGGGTCCGGCTGTTAGTACTTGGATGGGAGACCGCC           | -6.53043 | 0.049445             | 5S-rRNA   |
| CCCGGGCGTGCCTCGGACCCGCTCCGGGAC                 | -6.53127 | 0.028316             | 28S-rRNA  |
| TCCGAAGGACCGGGCATGGCT                          | -6.54331 | 0.041544             | 28S-rRNA  |
| CGACCTCAGATCAGACGTGGCGACCCG                    | -6.56423 | 0.026389             | 28S-rRNA  |
| CACGGCCCTGGCGGAGC                              | -6.58569 | 0.026399             | 18S-rRNA  |
| AGGGGGAAAGACTAATCGAACCATCTAG                   | -6.59331 | 0.032068             | 28S-rRNA  |
| CGGGGGCGGGCGGA                                 | -6.59877 | 0.03573              | 28S-rRNA  |
| TCGGGGGGCGGGCG                                 | -6.60514 | 0.000291             | 28S-rRNA  |
| CGGACTTCAGATCAGACGTGGCGACCCG                   | -6.60747 | 0.047611             | 28S-rRNA  |
| AGGCGTGGCGACCCGCTGAATTTAAGCATAT                | -6.61708 | 0.006368             | 28S-rRNA  |
| GGGGTCCGGCGGGGACC                              | -6.6626  | 3.39445030830454e-07 | 28S-rRNA  |
| GCCGCCGTTGGGGGCCCAAGTCTCTGAT                   | -6.6689  | 0.032797             | 28S-rRNA  |
| AGACGTGGGACCTGCTGAATTTAAGCA                    | -6.67111 | 0.006316             | 28S-rRNA  |
| TCCTTCGATGCGGC                                 | -6.71241 | 0.04085              | 28S-rRNA  |
| GGCCATACACCTGAACGCGCCGATCTGCTGATCT             | -6.719   | 0.049079             | 5S-rRNA   |
| CCGCTCCCCGGCGCTCGTGGGGGCCCAAGTCTCTGAT          | -6.7213  | 1.81985537940568e-06 | 28S-rRNA  |
| CGCGGGCCCGGCTTCC                               | -6.72816 | 0.032068             | 28S-rRNA  |
| AACGGCGAGTGAGCAGGGGAAGAGCC                     | -6.74361 | 0.047853             | 28S-rRNA  |
| CTCAGATCAGAGCTGGCGACCCGCTGAATTTAAGCATAT        | -6.74484 | 0.041562             | 28S-rRNA  |
| GCCCGCCCGCGGGGAGGTGGAGCACGAG                   | -6.76478 | 0.005326             | 28S-rRNA  |
| AGTAACGGGAGTGAACAGGGGAAGAGCCAG                 | -6.78348 | 0.000471             | 28S-rRNA  |
| ACTAATCTAGCCCTAGCCCTAC                         | -6.79317 | 0.017992             | 16S-rRNA  |
| AGTAACGGGAGTGAACAGGGGAAGAGC                    | -6.79928 | 0.006346             | 28S-rRNA  |
| CGGGTGGGGTCCGCG                                | -6.81041 | 0.02497              | 28S-rRNA  |
| ACTCCCGGGCGCTCGTGGGGGGCCCAAGTCTT               | -6.85306 | 0.043395             | 28S-rRNA  |
| CGGTGATCACTCGGC                                | -6.85795 | 0.02309              | 5.8S-rRNA |
| GCCGGGGGCGGGCGC                                | -6.86138 | 0.020774             | 18S-rRNA  |
| AGACGCGCGACCCGCTGAATTTAAGCATAT                 | -6.89771 | 0.007758             | 28S-rRNA  |
| GGTGAGCTTGAAGCTTAGGGCGGGGCCCGGG                | -6.90169 | 0.026952             | 28S-rRNA  |
| GGGGGGGCGGGCG                                  | -6.90549 | 0.029526             | 28S-rRNA  |
| GCGGGGGTGGCGGGG                                | -6.91537 | 0.01079              | 28S-rRNA  |
| GGGGCGGGCGCCGGCGG                              | -6.92839 | 0.023241             | 18S-rRNA  |
| AGGGGCCGGCGGGCGGCGACTCTGGACGC                  | -6.94861 | 0.011746             | 28S-rRNA  |
| AACGGCGGGTGAACAGGGGAAGAGCC                     | -6.95087 | 0.041236             | 28S-rRNA  |
| ATGATTAAGAGGACGGCCGGGGCACTCG                   | -6.95496 | 0.010824             | 18S-rRNA  |
| CTGGCGCTGGGAT                                  | -6.98593 | 0.040774             | 28S-rRNA  |
| AGTAACGGGAGTGGACAGGGGAAGAGCC                   | -7.00723 | 0.042921             | 28S-rRNA  |

|                                              |          |                      |                                                                               |
|----------------------------------------------|----------|----------------------|-------------------------------------------------------------------------------|
| ACGGCCATACCACCTGAACGCGCCGACCTCGTCTGATC       | -7.02438 | 0.038583             | 5S-rRNA                                                                       |
| ACTCTTAGATCGATGGTGGTCTCCGGAGT                | -7.02866 | 0.028827             | 45S-rRNA                                                                      |
| GGCGGGGGTCCGCGCGAGGGC                        | -7.03043 | 0.007607             | 18S-rRNA                                                                      |
| AGCAGCCGACTTAGGACTGGTGGGAC                   | -7.04119 | 0.028254             | 28S-rRNA                                                                      |
| GTGGAAGTCGGAATCCGCTAAGGAGTGTAACT             | -7.04526 | 0.047663             | 28S-rRNA                                                                      |
| AGACGTGGCGACCCGCTGAATTTAGCATAT               | -7.06392 | 0.011475             | 28S-rRNA                                                                      |
| AGATCAGACGTGGCGACCCGCTGAATTTAAGCATATTAGT     | -7.09815 | 4.82041453840159e-05 | 28S-rRNA                                                                      |
| AGCCCTGAAAATGGATGGCGCTGGAGCGTCGGGCC          | -7.10002 | 5.32983265725958e-05 | 28S-rRNA                                                                      |
| ACCTGCCGAATCAAC                              | -7.11425 | 0.00912              | 28S-rRNA                                                                      |
| ACGTTGAACGCACGTTCTGTTGGAAATCTGGCCG           | -7.12265 | 0.039801             | 28S-rRNA                                                                      |
| AGATGTGGCGACCCGCTGAATTTAAGCA                 | -7.12622 | 0.046275             | 28S-rRNA                                                                      |
| AGGTGTCTAAGGCGAGCCAGGGAGGACAGAAACCTCCCG      | -7.13425 | 0.023517             | 28S-rRNA                                                                      |
| AACCCGGTAGCTCCCTCCCGCTCCGGCCAGGGGT           | -7.13959 | 0.029645             | 18S-rRNA                                                                      |
| GACCGGCTCCGGGACGGC                           | -7.1564  | 0.04757              | 28S-rRNA                                                                      |
| AGACGTGGCGACCCGCTGAATTTAAGCGTAT              | -7.19421 | 0.012691             | 28S-rRNA                                                                      |
| CACCTGGTTGATCTGC                             | -7.20774 | 0.016354             | 45S-rRNA                                                                      |
| AGACGACCTGCTTCTGGTAGGGGTTTCGACGTAG           | -7.21119 | 0.025265             | 28S-rRNA                                                                      |
| AACCCGGTGGGCTCCCTCCCGCTCCGGCCGGGG            | -7.223   | 0.02575              | 18S-rRNA                                                                      |
| TTTGAACGCACGTTCTGTTGGAACCTGGCGCTAAACATTCCG   | -7.25362 | 0.030702             | 28S-rRNA                                                                      |
| GCGGTTCCGCGCGCTCCGGTAGCTCTCG                 | -7.25435 | 0.018451             | 28S-rRNA                                                                      |
| CGGCCGATCGAAAGGAGTGGGTTACAGATCCCGAATC        | -7.31804 | 0.041506             | 28S-rRNA                                                                      |
| AGGGGAATCCGACTGTTTAAATAAAACAAGCATCG          | -7.32309 | 0.044268             | 28S-rRNA                                                                      |
| ACTCCCGCGCCGCTCGTGGGGGCCAAATCTTCTGAT         | -7.33328 | 0.012963             | 28S-rRNA                                                                      |
| CGGGGGCGGGCGCCGGC                            | -7.33793 | 0.001723             | 18S-rRNA                                                                      |
| GGGGCGGGCGCCGG                               | -7.35361 | 0.001575             | 18S-rRNA                                                                      |
| GATCGATGGTGGTCTCCGGAGTTC                     | -7.37066 | 0.009519             | 45S-rRNA                                                                      |
| TCCCGGCTCCCTC                                | -7.39183 | 0.009382             | 28S-rRNA                                                                      |
| GTGGCGACCCGCTGAATTTAAGCATAT                  | -7.45097 | 0.00221              | 28S-rRNA                                                                      |
| AGACGTGGCGACCCGCTTAAAT                       | -7.46701 | 0.009868             | 28S-rRNA                                                                      |
| ACGTTCTGGGGAACTGG                            | -7.47336 | 0.008406             | 28S-rRNA                                                                      |
| ACGTTGAACGCACGTTCTGGTGGAACTGGAGC             | -7.48625 | 0.012309             | 28S-rRNA                                                                      |
| AGACGTGGCGACCCGCTGAATTTAAGCATAT              | -7.54173 | 0.01145              | 28S-rRNA                                                                      |
| ATCGGAAGGCCGCGCGGGTGTGA                      | -7.56939 | 0.011526             | 28S-rRNA                                                                      |
| ACGTGTTAGGACCCGAAAGATGGTGAAC                 | -7.61142 | 0.004905             | 28S-rRNA                                                                      |
| CCCGGGCGGGCTGGGC                             | -7.63464 | 0.005683             | 28S-rRNA                                                                      |
| AGCGGGGAAAGAAGACCTGTTGAGCTTGACTC             | -7.88855 | 0.000956             | 28S-rRNA                                                                      |
| AGACGTGGCGCCCGCTGAATTTAAGCATAT               | -7.98683 | 0.004489             | 28S-rRNA                                                                      |
| TCCCGGGCGGGCTGGGC                            | -8.12469 | 0.001309             | 28S-rRNA                                                                      |
| AAGGTGAACGCTCTGGCATGTTGGAACAATGTAGG          | -8.31886 | 0.00089              | 28S-rRNA                                                                      |
| CACGGCCCTGGCGGAGCGCTGAGAAGA                  | -8.36221 | 0.000272             | 18S-rRNA                                                                      |
| CGGGTTCGGCGCGAC                              | -8.40176 | 1.14834286852693e-05 | 28S-rRNA                                                                      |
| GTAACCTCGGGATAAGGATTGGCTTAAGGGCTGGGTCGGT     | -8.40693 | 0.003142             | 28S-rRNA                                                                      |
| GGTTCGGCGCGCTCCGGTAGCTC                      | -8.48832 | 0.000274             | 28S-rRNA                                                                      |
| CGAATCCCCCGCGCGCTCGCGGCTGGAAATGTGGCG         | -8.55178 | 0.002071             | 28S-rRNA                                                                      |
| CGGGCGGGCGGTCGCGCGGAGGCGGAC                  | -8.55354 | 1.13958320983031e-06 | 18S-rRNA                                                                      |
| AGATCAGACGTGGCGACCCGCTGAATTTAAGCATAT         | -8.75554 | 7.1931477355126e-05  | 28S-rRNA                                                                      |
| CACCGCCCGCGCGGTTGCTTCCCGGTCAGGGAAC           | 6.921804 | 0.0118               | mature-tRNA-Glu-TTC;mature-tRNA-Glu-CTC                                       |
| AGGTACGTCGGGGTAC                             | 5.843326 | 0.025491             | mature-tRNA-Trp-CCA                                                           |
| GCCCGCTAGCTCAGTCGGTAGACATGAGACTCTTAAT        | 5.746843 | 0.049153             | mature-tRNA-Lys-CTT_5_end                                                     |
| ACCCCGCGGGCCGGTTCGTTCCCGCTCAGGGAAC           | 5.108295 | 0.008506             | mature-tRNA-Glu-CTC;mature-tRNA-Glu-TTC                                       |
| TGGTCTAGTGGTTAGGATTCGGC                      | 3.807017 | 0.023135             | mature-tRNA-Glu-CTC;mature-tRNA-Glu-TTC                                       |
| GGTGAATATAGTTTACAATAAACATTAGACTGTGAATCTGACAA | 3.152935 | 0.025548             | mature-mt_tRNA-His-GTG_5_end                                                  |
| GGTGAATATAGTTTACAATAAACATTAGACTGTGAATCTGACAA | 2.719916 | 0.017946             | mature-mt_tRNA-His-GTG_5_end                                                  |
| GGTGAATATAGTTTACAATAAACATTAGACTGTGAATCTGACAA | 2.520269 | 0.016774             | mature-mt_tRNA-His-GTG_5_end                                                  |
| GGTGAATATAGTTTACAATAAACATTAGACTGTGAATCTGAC   | 2.482346 | 0.049782             | mature-mt_tRNA-His-GTG_5_end                                                  |
| ATCTCGGTGGAACCTCC                            | -2.51219 | 0.024804             | mature-tRNA-Gln-CTG;mature-tRNA-Gln-TTG                                       |
| TCCACATGCTAGCGGTTAGGATTCCT                   | -2.8984  | 0.022277             | mature-tRNA-Glu-TTC_5_end                                                     |
| CCAGGCGGGCCGGTTCGACTCCCGGTGTTGGAA            | -3.01027 | 0.006707             | mature-tRNA-Glu-TTC_3_end                                                     |
| GCATGGGTGGTTCAGTGGTGAATCTC                   | -3.22032 | 0.040173             | mature-tRNA-Gly-GCC_5_end                                                     |
| ACTTGAACCTGAATC                              | -3.54229 | 0.0288               | mature-tRNA-Gln-CTG;mature-tRNA-Gln-TTG                                       |
| GCATGGGTGGTTCAGTGGTGAATCTC                   | -3.6291  | 0.007699             | mature-tRNA-Gly-GCC_5_end                                                     |
| TCCGGCTCGAAGGACC                             | -3.76234 | 0.031456             | mature-tRNA-Tyr-GTA                                                           |
| AGGGTTCAAGTCCCTGTCGGCGCC                     | -4.07211 | 0.028941             | mature-tRNA-Lys-TTT                                                           |
| TCCCGGCATCTCCACC                             | -4.20008 | 0.027071             | mature-tRNA-Ala-TGC;mature-tRNA-Ala-CGC;mature-tRNA-Ala-AGC                   |
| AATGGTTAGCACTCGGACTTTGAATC                   | -4.41884 | 0.032156             | mature-tRNA-Gln-TTG;mature-tRNA-Gln-CTG                                       |
| TCCACATGCTAGCGGTTAGGATTC                     | -4.54318 | 6.1376770263067e-05  | mature-tRNA-Glu-TTC_5_end                                                     |
| GGCTCTGGTCTAGGGGTATGATCT                     | -4.80311 | 0.024805             | mature-tRNA-Pro-TGG_5_end;mature-tRNA-Pro-AGG_5_end;mature-tRNA-Pro-CGG_5_end |
| GGTTCCATGTTAATGGTTAGCACTC                    | 6.921804 | 0.0118               | mature-tRNA-Gln-CTG_5_end;mature-tRNA-Gln-TTG_5_end                           |
| AGGGCGCCCGGTTGACTCCCGGTGGGGAACC              | 5.843326 | 0.025491             | mature-tRNA-Glu-TTC                                                           |
| CCCACATGGTTCAGCGGTAGGATTCCTGGT               | 5.746843 | 0.049153             | mature-tRNA-Glu-TTC                                                           |
| GCTTCTGATGTAGTGGTTATCACGTTCCGCT              | 5.108295 | 0.008506             | mature-tRNA-Val-CAC_5_end                                                     |
| ACGGGGCGGAAACAC                              | 3.807017 | 0.023135             | mature-tRNA-Val-CAC;mature-tRNA-Val-AAC;mature-tRNA-Gly-ACC                   |
| AGCGGTAGGATTCCTGGTTTCCACC                    | 3.152935 | 0.025548             | mature-tRNA-Glu-TTC                                                           |
| CAATGAACACTGACC                              | 2.719916 | 0.017946             | mature-mt_tRNA-Val-TAC                                                        |
| AAGAAAGATTGCAAGAACT                          | 2.520269 | 0.016774             | mature-mt_tRNA-Ser-GCT_5_end                                                  |
| AATTAATAACTGACTTCCAATTAGTAGATTCTGAATAAAC     | 2.482346 | 0.049782             | mature-mt_tRNA-Gly-TCC                                                        |
| ACATGGTCTAGCGGTTAGGATTCCTGGTTTCCACC          | -2.51219 | 0.024804             | mature-tRNA-Glu-TTC                                                           |
| GCTTCTGATGTAGTGGTTATCACGTTCCG                | -2.8984  | 0.022277             | mature-tRNA-Val-CAC_5_end                                                     |
| AGTGGTTAGGATTCGGCGCTCTCACCG                  | -3.01027 | 0.006707             | mature-tRNA-Glu-CTC                                                           |

**Supplemental Table 4. Primer Sequences used for QPCR**

| <b>Genes</b>  | <b>Primer sequences</b>                                          | <b>Genes</b>  | <b>Primer sequences</b>                                         |
|---------------|------------------------------------------------------------------|---------------|-----------------------------------------------------------------|
| hGAPDH        | 5'- GGCCTCCAAGGAGTAAGACC-3'<br>5'- AGGGGAGATTCAGTGTGGTG-3'       | hIL-1 $\beta$ | 5'- CGCCAATGACTCAGAGGAAGA-3'<br>5'- AGGGCGTCATTCAGGATGAA-3'     |
| hMCP-1        | 5'- GATGCAATCAATGCCCCAGTC-3'<br>5'- TCCTTGCCACAATGGTCTT-3'       | hICAM-1       | 5'- ATGCCCAGACATCTGTGTCC-3'<br>5'- GGGGTCTCTATGCCCAACAA-3'      |
| hIL-6         | 5'- GGTACATCCTCGACGGCATCT-3'<br>5'- GTGCCTCTTTGCTGCTTTCAC-3'     | hVCAM-1       | 5'- TTTGACAGGCTGGAGATAGACT-3'<br>5'- TCAATGTGTAATTTAGCTCGGCA-3' |
| mGAPDH        | 5'-AACTTTGGCATTGTGGAAGG-3'<br>5'-GGATGCAGGGATGATGTTCT-3'         | mALKBH3       | 5'-GCCAGGTAGCCATCCCTT-3'<br>5'-AGGGGAAGCTGGCTGAGT-3'            |
| mDNMT2        | 5'-AGCCTGTGGCTTTTTCAGTATCA-3'<br>5'-TTGGCTGACTTTCTTCAACTACTGC-3' | mRNase L      | 5'-TAGGCGAACACATCAATGAGGA-3'<br>5'-CTGCCTCTGGAACGCTGAG-3'       |
| mNSUN2        | 5'-TTGGACGACGACGAGGA-3'<br>5'-CCATTCTCCTTAGCGAACATG-3'           | mRNase T2     | 5'-ACTATGGCCCGATAGAGCAGA-3'<br>5'-ATTGGCTGCGATTAGAAGACC-3'      |
| mMETTL3       | 5'-CAGTGCTACAGGATGACGGCTT-3'<br>5'-CCGTCCATGATGCGCTGCAG-3'       | mDICER1       | 5'-GGTCCTTTCTTTGGACTGCCA-3'<br>5'-GCGATGAACGTCTTCCCTGA-3'       |
| mADAR1        | 5'-TGAGCATAGCAAGTGGAGATACC-3'<br>5'-GCCGCCCTTTGAGAACTCT-3'       | mANG          | 5'-CATCCCAACAGGAAGGAAGGA-3'<br>5'-ACCTGGAGTCATCCTGAGCC-3'       |
| mALKBH1       | 5'-AAGCGAAGACCCCGAAGTTTA-3'<br>5'-CAGTGCGGACTTGTCTGA-3'          | mBMP4         | 5'-TTCCTGGTAACCGAATGCTGA-3'<br>5'-CCTGAATCTCGGCGACTTTTT-3'      |
| mSox17        | 5'-GATGCGGGATACGCCAGTG-3'<br>5'-CCACCACCTCGCCTTTCAC-3'           | mID1          | 5'-CCTAGCTGTTTCGCTGAAGGC-3'<br>5'-CTCCGACAGACCAAGTACCAC-3'      |
| mIL-1 $\beta$ | 5'-TTCAGGCAGGCAGTATCACTC-3'<br>5'-GAAGGTCCACGGGAAAGACAC-3'       | mTMEM1000     | 5'-GACAATGGAGAAAAACCCCAAGA-3'<br>5'-GGTAGCAGGAGAGTTCGGC-3'      |
| mE-Selectin   | 5'-ATGCCTCGCGCTTTCTCTC-3'<br>5'-GTAGTCCCCTGACAGTATGC-3'          | mTGFB1        | 5'-CCACCTGCAAGACCATCGAC-3'<br>5'-CTGGCGAGCCTTAGTTTGGAC-3'       |
| mEndothelin   | 5'-GCACCGGAGCTGAGAATGG-3'<br>5'-GTGGCAGAAGTAGACACTC-3'           |               |                                                                 |
