# Supplementary material for: Paternal hypercholesterolemia elicits sex-specific exacerbation of atherosclerosis in offspring
Source: PubMed Central journal article supplement (PMC11385100; doi:10.1172/jci.insight.179291), 2024-09-10

p-p65

65 kDA

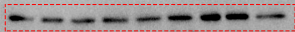

p65

65 kDA

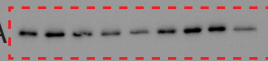

Actin

42 kDA

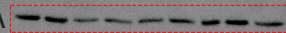

Supplement: jciinsight-9-179291-s013.pdf [file jciinsight-9-179291-s013.pdf]
